# Supplementary material for: SAAMBE: Webserver to Predict the Charge of Binding Free Energy Caused by Amino Acids Mutations
Source: Int J Mol Sci. 2016 Apr 12;17(4):547. doi: 10.3390/ijms17040547 (PMC4849003; doi:10.3390/ijms17040547)
Supplement: Supplementary file 1 [file ijms-17-00547-s001.xlsx]

## Sheet: Table S1
Table S1. sDB database.
Name	Chain	Res_in	Pos_ini	Pos_sequence	Res_out	Part1	Part2	ddGexp_av
1a22	A	C	182	182	A	A	B	1.00925
1a22	A	D	26	26	A	A	B	-0.20554
1a22	A	D	171	171	A	A	B	0.79502
1a22	A	E	56	56	A	A	B	0.4051
1a22	A	E	65	65	A	A	B	-0.486275
1a22	A	E	66	66	A	A	B	0.42954
1a22	A	E	174	174	A	A	B	-0.91179
1a22	A	E	186	186	A	A	B	-0.00598
1a22	A	F	10	10	A	A	B	1.03865
1a22	A	F	25	25	A	A	B	-0.438895
1a22	A	F	54	54	A	A	B	0.86876
1a22	A	F	176	176	A	A	B	0.4102
1a22	A	F	191	191	A	A	B	0.19108
1a22	A	G	187	187	A	A	B	0.3398
1a22	A	H	18	18	A	A	B	-0.492925
1a22	A	H	21	21	A	A	B	0.17763
1a22	A	I	4	4	A	A	B	0.40835
1a22	A	I	58	58	A	A	B	1.63663
1a22	A	I	179	179	A	A	B	0.802705
1a22	A	K	70	70	A	A	B	0.52034
1a22	A	K	168	168	A	A	B	-0.177335
1a22	A	K	172	172	A	A	B	2.0064
1a22	A	L	6	6	A	A	B	0.59905
1a22	A	L	9	9	A	A	B	-0.04004
1a22	A	L	15	15	A	A	B	0.14961
1a22	A	L	45	45	A	A	B	1.21157
1a22	A	L	73	73	A	A	B	-0.19986
1a22	A	M	14	14	A	A	B	0.05
1a22	A	N	12	12	A	A	B	0.09985
1a22	A	N	63	63	A	A	B	0.30701
1a22	A	P	5	5	A	A	B	0.42954
1a22	A	P	48	48	A	A	B	0.4102
1a22	A	P	59	59	A	A	B	0.37994
1a22	A	P	61	61	A	A	B	1.20798
1a22	A	Q	22	22	A	A	B	-0.209795
1a22	A	Q	29	29	A	A	B	-0.594195
1a22	A	Q	46	46	A	A	B	0.10395
1a22	A	Q	68	68	A	A	B	0.5939
1a22	A	Q	69	69	A	A	B	-0.04999
1a22	A	Q	181	181	A	A	B	0.2701
1a22	A	R	8	8	A	A	B	0.19991
1a22	A	R	16	16	A	A	B	0.2381
1a22	A	R	19	19	A	A	B	0.05119
1a22	A	R	64	64	A	A	B	1.72039
1a22	A	R	167	167	A	A	B	0.28907
1a22	A	R	178	178	A	A	B	2.4115
1a22	A	R	183	183	A	A	B	0.521125
1a22	A	S	7	7	A	A	B	0.3398
1a22	A	S	51	51	A	A	B	0.323925
1a22	A	S	55	55	A	A	B	0.11015
1a22	A	S	57	57	A	A	B	0.19991
1a22	A	S	62	62	A	A	B	0.12763
1a22	A	S	71	71	A	A	B	0.40835
1a22	A	S	184	184	A	A	B	-0.04999
1a22	A	S	188	188	A	A	B	-0.19986
1a22	A	T	3	3	A	A	B	-0.04999
1a22	A	T	175	175	A	A	B	1.95245
1a22	A	V	180	180	A	A	B	0
1a22	A	V	185	185	A	A	B	0.86876
1a22	A	Y	42	42	A	A	B	0.19956
1a22	A	Y	164	164	A	A	B	0.323925
1a22	B	C	308	108	A	A	B	0
1a22	B	C	322	122	A	A	B	0
1a22	B	D	326	126	A	A	B	0.990815
1a22	B	D	364	164	A	A	B	1.52384
1a22	B	D	405	205	A	A	B	-0.04614
1a22	B	E	242	42	A	A	B	0.52983
1a22	B	E	244	44	A	A	B	1.45727
1a22	B	E	279	79	A	A	B	-0.07902
1a22	B	E	282	82	A	A	B	0.7822
1a22	B	E	291	91	A	A	B	0.1776
1a22	B	E	320	120	A	A	B	-0.19061
1a22	B	E	327	127	A	A	B	0.83723
1a22	B	E	373	173	A	A	B	0.08271
1a22	B	E	375	175	A	A	B	-0.07902
1a22	B	E	380	180	A	A	B	0.19912
1a22	B	E	407	207	A	A	B	-0.07902
1a22	B	E	409	209	A	A	B	-0.06235
1a22	B	E	424	224	A	A	B	0.1079
1a22	B	F	296	96	S	A	B	-0.041005
1a22	B	F	300	100	A	A	B	-0.01498
1a22	B	I	303	103	A	A	B	1.36154
1a22	B	I	305	105	A	A	B	1.50248
1a22	B	I	328	128	A	A	B	0.5878
1a22	B	I	365	165	A	A	B	2.1521
1a22	B	K	281	81	A	A	B	0.14377
1a22	B	K	310	110	A	A	B	0.0428
1a22	B	K	321	121	A	A	B	0.0870133
1a22	B	K	367	167	A	A	B	-0.0125567
1a22	B	K	379	179	A	A	B	0
1a22	B	K	403	203	A	A	B	0.23995
1a22	B	K	406	206	A	A	B	0.19912
1a22	B	K	415	215	A	A	B	0.691277
1a22	B	N	272	72	A	A	B	0.078285
1a22	B	N	297	97	A	A	B	-0.25493
1a22	B	N	418	218	A	A	B	0.298587
1a22	B	P	241	41	A	A	B	0.25936
1a22	B	P	306	106	A	A	B	2.96296
1a22	B	Q	274	74	A	A	B	-0.145113
1a22	B	Q	278	78	A	A	B	-0.4102
1a22	B	Q	330	130	A	A	B	-0.03035
1a22	B	Q	366	166	A	A	B	0.0123833
1a22	B	Q	416	216	A	A	B	0.89307
1a22	B	R	239	39	A	A	B	0.26882
1a22	B	R	243	43	A	A	B	1.67749
1a22	B	R	243	43	L	A	B	0.52099
1a22	B	R	243	43	M	A	B	0.99928
1a22	B	R	270	70	A	A	B	0.598993
1a22	B	R	271	71	A	A	B	0.55797
1a22	B	R	411	211	A	A	B	0.0564
1a22	B	R	417	217	A	A	B	0.25123
1a22	B	S	247	47	A	A	B	-0.01498
1a22	B	S	298	98	A	A	B	-0.13309
1a22	B	S	299	99	A	A	B	-0.50638
1a22	B	S	302	102	A	A	B	-0.0288075
1a22	B	S	324	124	A	A	B	0.25123
1a22	B	S	419	219	A	A	B	0.031915
1a22	B	T	251	51	A	A	B	0.0697
1a22	B	T	273	73	A	A	B	-0.0299775
1a22	B	T	277	77	A	A	B	0.0497133
1a22	B	T	301	101	A	A	B	1.53472
1a22	B	T	394	194	A	A	B	0.201327
1a22	B	T	395	195	A	A	B	-0.0947767
1a22	B	V	325	125	A	A	B	1.14091
1a22	B	V	329	129	A	A	B	-0.04614
1a22	B	V	371	171	A	A	B	-0.65823
1a22	B	W	276	76	A	A	B	0.545632
1a22	B	W	280	80	A	A	B	0.0322175
1a22	B	W	304	104	A	A	B	4.5
1a22	B	W	304	104	F	A	B	2.7817
1a22	B	W	369	169	A	A	B	4.5
1a22	B	Y	295	95	A	A	B	0.19912
1a4y	A	D	435	435	A	A	B	3.49389
1a4y	A	E	287	287	A	A	B	0.10018
1a4y	A	E	344	344	A	A	B	0.192803
1a4y	A	E	401	401	A	A	B	0.89425
1a4y	A	I	459	459	A	A	B	0.692893
1a4y	A	K	320	320	A	A	B	-0.303217
1a4y	A	R	33	33	A	A	B	0.3
1a4y	A	R	457	457	A	A	B	-0.207913
1a4y	A	S	289	289	A	A	B	0.0140967
1a4y	A	W	261	261	A	A	B	0.10018
1a4y	A	W	263	263	A	A	B	1.19002
1a4y	A	W	318	318	A	A	B	1.49969
1a4y	A	W	375	375	A	A	B	1.0114
1a4y	A	Y	434	434	A	A	B	3.28613
1a4y	A	Y	434	434	F	A	B	0.57862
1a4y	A	Y	437	437	A	A	B	0.811793
1a4y	A	Y	437	437	F	A	B	0.222495
1a4y	B	E	108	108	A	A	B	-0.307453
1a4y	B	H	8	8	A	A	B	0.901037
1a4y	B	H	13	13	A	A	B	-0.298783
1a4y	B	H	84	84	A	A	B	0.190083
1a4y	B	H	114	114	A	A	B	0.65305
1a4y	B	K	40	40	G	A	B	3.23319
1a4y	B	K	40	40	Q	A	B	4.24769
1a4y	B	N	68	68	A	A	B	0.17256
1a4y	B	Q	12	12	A	A	B	0.299977
1a4y	B	R	31	31	A	A	B	0.2
1a4y	B	R	32	32	A	A	B	0.90308
1a4y	B	R	66	66	A	A	B	0.200893
1a4y	B	R	70	70	A	A	B	-0.210557
1a4y	B	W	89	89	A	A	B	0.213317
1acb	I	L	45	45	D	E	I	6.76702
1acb	I	L	45	45	E	E	I	6.5499
1acb	I	L	45	45	G	E	I	6.02922
1acb	I	L	45	45	I	E	I	4.22785
1acb	I	L	45	45	P	E	I	6.84815
1acb	I	L	45	45	S	E	I	4.94793
1ahw	A	T	197	197	A	AB	C	1.32249
1ahw	C	D	178	178	A	AB	C	-0.492135
1ahw	C	L	176	176	A	AB	C	0.99314
1ahw	C	N	199	199	A	AB	C	1.0775
1ahw	C	T	167	167	A	AB	C	-0.037035
1ahw	C	T	170	170	A	AB	C	1.05252
1ahw	C	V	198	198	A	AB	C	-0.30701
1ahw	C	Y	156	156	A	AB	C	4
1ahw	C	Y	157	157	A	AB	C	-1.88775
1ak4	C	A	488	88	G	B	C	4.01454
1ak4	C	A	488	88	V	B	C	2.13155
1ak4	C	A	492	92	G	B	C	1.9431
1ak4	C	A	492	92	V	B	C	1.72136
1ak4	C	G	489	89	A	B	C	3.4378
1ak4	C	G	489	89	V	B	C	4.39025
1ak4	C	H	487	87	A	B	C	2.37151
1ak4	C	H	487	87	Q	B	C	2.33451
1ak4	C	H	487	87	R	B	C	3.00652
1ak4	C	I	491	91	A	B	C	1.6026
1ak4	C	I	491	91	V	B	C	1.36265
1ak4	C	P	485	85	A	B	C	2.44716
1ak4	C	P	490	90	A	B	C	3.53324
1ak4	C	P	493	93	A	B	C	2.0448
1ak4	C	V	486	86	A	B	C	2.3533
1brs	A	D	54	54	A	A	D	-0.61835
1brs	A	D	101	101	A	A	D	1.5
1brs	A	E	60	60	A	A	D	-0.00374
1brs	A	E	73	73	A	A	D	2.4627
1brs	A	E	73	73	C	A	D	2.52594
1brs	A	E	73	73	F	A	D	2.23269
1brs	A	E	73	73	Q	A	D	1.45048
1brs	A	E	73	73	S	A	D	3.00713
1brs	A	E	73	73	W	A	D	1.65541
1brs	A	E	73	73	Y	A	D	2.41104
1brs	A	H	102	102	A	A	D	6.27216
1brs	A	H	102	102	D	A	D	4.54552
1brs	A	H	102	102	G	A	D	6.81325
1brs	A	H	102	102	L	A	D	7.65781
1brs	A	H	102	102	Q	A	D	4.54552
1brs	A	K	27	27	A	A	D	5.19026
1brs	A	N	58	58	A	A	D	3.09174
1brs	A	R	59	59	A	A	D	5.02655
1brs	A	R	59	59	K	A	D	2.48535
1brs	A	R	83	83	Q	A	D	5.41398
1brs	A	R	87	87	A	A	D	5.668
1brs	A	W	35	35	F	A	D	1.25886
1brs	D	D	35	35	A	A	D	4.35442
1brs	D	D	39	39	A	A	D	6.81426
1brs	D	E	76	76	A	A	D	1.16176
1brs	D	E	80	80	A	A	D	0.48415
1brs	D	T	42	42	A	A	D	1.82778
1brs	D	W	38	38	F	A	D	1.64079
1brs	D	W	44	44	F	A	D	0.0564
1brs	D	Y	29	29	A	A	D	3.43334
1brs	D	Y	29	29	F	A	D	-0.13205
1bxi	A	D	26	26	A	A	B	0.34
1bxi	A	D	51	51	A	A	B	5.92
1bxi	A	D	60	60	A	A	B	0.51
1bxi	A	E	30	30	A	A	B	0.815
1bxi	A	E	31	31	A	A	B	0.31
1bxi	A	E	32	32	A	A	B	0.22
1bxi	A	E	41	41	A	A	B	2.08
1bxi	A	E	42	42	A	A	B	0.66
1bxi	A	E	45	45	A	A	B	0.21
1bxi	A	H	46	46	A	A	B	0.83
1bxi	A	I	53	53	A	A	B	0.85
1bxi	A	K	35	35	A	A	B	0.19
1bxi	A	L	33	33	A	A	B	3.42
1bxi	A	L	36	36	A	A	B	0.91
1bxi	A	L	52	52	A	A	B	0.6
1bxi	A	N	24	24	A	A	B	0.14
1bxi	A	S	28	28	A	A	B	0.17
1bxi	A	S	29	29	A	A	B	0.96
1bxi	A	S	50	50	A	A	B	2.19
1bxi	A	S	63	63	A	A	B	0.87
1bxi	A	T	27	27	A	A	B	0.73
1bxi	A	T	38	38	A	A	B	0.9
1bxi	A	T	44	44	A	A	B	0.3
1bxi	A	V	34	34	A	A	B	2.58
1bxi	A	V	37	37	A	A	B	1.66
1bxi	A	V	68	68	A	A	B	1.86
1bxi	A	Y	54	54	A	A	B	4.83
1bxi	A	Y	55	55	A	A	B	4.63
1bxi	B	D	24	24	A	A	B	0.34
1c08	A	N	31	31	A	AB	C	5.25
1c08	A	N	32	32	A	AB	C	5.2
1c08	A	Q	53	53	A	AB	C	1
1c08	A	Y	96	96	A	AB	C	2.8
1c08	B	D	32	32	A	AB	C	2
1c08	B	D	101	101	A	AB	C	1.5
1c08	B	S	31	31	A	AB	C	0.2
1c08	B	W	98	98	A	AB	C	5.5
1c08	B	Y	33	33	A	AB	C	6
1c08	B	Y	53	53	A	AB	C	3.29
1c08	B	Y	58	58	A	AB	C	1.7
1c08	C	H	15	15	A	AB	C	-0.5
1c08	C	I	98	98	A	AB	C	-0.1
1c08	C	K	96	96	A	AB	C	7
1c08	C	K	97	97	A	AB	C	6
1c08	C	L	75	75	A	AB	C	1.25
1c08	C	N	93	93	A	AB	C	0.6
1c08	C	R	21	21	A	AB	C	1
1c08	C	R	73	73	A	AB	C	-0.2
1c08	C	S	100	100	A	AB	C	0.25
1c08	C	T	89	89	A	AB	C	0
1c08	C	W	63	63	A	AB	C	0.3
1c08	C	Y	20	20	A	AB	C	5
1cbw	I	F	33	33	A	FGH	I	0.14064
1cbw	I	G	12	12	A	FGH	I	0.67808
1cbw	I	G	36	36	A	FGH	I	0.95342
1cbw	I	G	37	37	A	FGH	I	0.81214
1cbw	I	I	18	18	A	FGH	I	1.40495
1cbw	I	I	19	19	A	FGH	I	0.127093
1cbw	I	K	15	15	A	FGH	I	2.04469
1cbw	I	K	15	15	D	FGH	I	5.23096
1cbw	I	K	15	15	E	FGH	I	3.8765
1cbw	I	K	15	15	F	FGH	I	-1.96249
1cbw	I	K	15	15	G	FGH	I	4.11006
1cbw	I	K	15	15	H	FGH	I	0.099525
1cbw	I	K	15	15	I	FGH	I	2.93926
1cbw	I	K	15	15	L	FGH	I	-1.58479
1cbw	I	K	15	15	M	FGH	I	-1.41704
1cbw	I	K	15	15	N	FGH	I	1.32633
1cbw	I	K	15	15	Q	FGH	I	0.307695
1cbw	I	K	15	15	R	FGH	I	-0.61355
1cbw	I	K	15	15	S	FGH	I	3.39879
1cbw	I	K	15	15	T	FGH	I	2.09215
1cbw	I	K	15	15	V	FGH	I	2.14173
1cbw	I	K	15	15	W	FGH	I	-2.44177
1cbw	I	K	15	15	Y	FGH	I	-2.62099
1cbw	I	K	46	46	A	FGH	I	0.14064
1cbw	I	P	13	13	A	FGH	I	-0.05584
1cbw	I	R	17	17	A	FGH	I	0.445783
1cbw	I	R	20	20	A	FGH	I	0.33341
1cbw	I	R	39	39	A	FGH	I	0.21317
1cbw	I	T	11	11	A	FGH	I	0.21317
1cbw	I	V	34	34	A	FGH	I	0.0336567
1cbw	I	Y	35	35	A	FGH	I	0.877595
1cho	I	A	15	15	C	EFG	I	-0.32203
1cho	I	A	15	15	D	EFG	I	0
1cho	I	A	15	15	E	EFG	I	0.22174
1cho	I	A	15	15	F	EFG	I	-0.7248
1cho	I	A	15	15	G	EFG	I	0.06506
1cho	I	A	15	15	H	EFG	I	-0.32203
1cho	I	A	15	15	I	EFG	I	0.64585
1cho	I	A	15	15	K	EFG	I	2.46244
1cho	I	A	15	15	L	EFG	I	0.13866
1cho	I	A	15	15	M	EFG	I	0.13866
1cho	I	A	15	15	N	EFG	I	-0.28471
1cho	I	A	15	15	P	EFG	I	3.06381
1cho	I	A	15	15	Q	EFG	I	0.43603
1cho	I	A	15	15	R	EFG	I	0.46175
1cho	I	A	15	15	S	EFG	I	0.06506
1cho	I	A	15	15	T	EFG	I	0.955
1cho	I	A	15	15	V	EFG	I	0.92487
1cho	I	A	15	15	W	EFG	I	-1.89737
1cho	I	A	15	15	Y	EFG	I	-0.86282
1cho	I	E	19	19	A	EFG	I	2.29936
1cho	I	E	19	19	C	EFG	I	2.68872
1cho	I	E	19	19	D	EFG	I	0.86895
1cho	I	E	19	19	F	EFG	I	3.57007
1cho	I	E	19	19	G	EFG	I	3.57007
1cho	I	E	19	19	H	EFG	I	2.05938
1cho	I	E	19	19	I	EFG	I	2.60406
1cho	I	E	19	19	K	EFG	I	3.54244
1cho	I	E	19	19	L	EFG	I	2.82738
1cho	I	E	19	19	M	EFG	I	2.65912
1cho	I	E	19	19	N	EFG	I	2.29936
1cho	I	E	19	19	P	EFG	I	2.55314
1cho	I	E	19	19	Q	EFG	I	1.31476
1cho	I	E	19	19	R	EFG	I	3.62839
1cho	I	E	19	19	S	EFG	I	2.75378
1cho	I	E	19	19	T	EFG	I	2.86713
1cho	I	E	19	19	V	EFG	I	2.40401
1cho	I	E	19	19	W	EFG	I	3.11413
1cho	I	E	19	19	Y	EFG	I	2.6304
1cho	I	G	32	32	A	EFG	I	-0.918195
1cho	I	G	32	32	C	EFG	I	2.50652
1cho	I	G	32	32	D	EFG	I	3.06381
1cho	I	G	32	32	E	EFG	I	2.57781
1cho	I	G	32	32	F	EFG	I	0.10068
1cho	I	G	32	32	H	EFG	I	-0.96926
1cho	I	G	32	32	I	EFG	I	2.33298
1cho	I	G	32	32	K	EFG	I	1.5661
1cho	I	G	32	32	L	EFG	I	1.72526
1cho	I	G	32	32	M	EFG	I	1.61277
1cho	I	G	32	32	N	EFG	I	0.93967
1cho	I	G	32	32	P	EFG	I	0.31939
1cho	I	G	32	32	Q	EFG	I	2.34908
1cho	I	G	32	32	R	EFG	I	1.71946
1cho	I	G	32	32	S	EFG	I	-0.13558
1cho	I	G	32	32	T	EFG	I	2.04619
1cho	I	G	32	32	V	EFG	I	0.637825
1cho	I	G	32	32	W	EFG	I	1.04129
1cho	I	G	32	32	Y	EFG	I	-0.96926
1cho	I	K	13	13	A	EFG	I	0.17841
1cho	I	K	13	13	C	EFG	I	0.49596
1cho	I	K	13	13	D	EFG	I	-0.50364
1cho	I	K	13	13	E	EFG	I	0.17841
1cho	I	K	13	13	F	EFG	I	1.07745
1cho	I	K	13	13	G	EFG	I	1.79596
1cho	I	K	13	13	H	EFG	I	0.13866
1cho	I	K	13	13	I	EFG	I	1.52277
1cho	I	K	13	13	L	EFG	I	0.3751
1cho	I	K	13	13	M	EFG	I	0.42003
1cho	I	K	13	13	N	EFG	I	-0.35574
1cho	I	K	13	13	P	EFG	I	2.04619
1cho	I	K	13	13	Q	EFG	I	-0.56457
1cho	I	K	13	13	R	EFG	I	-0.37231
1cho	I	K	13	13	S	EFG	I	-0.42044
1cho	I	K	13	13	T	EFG	I	0.3751
1cho	I	K	13	13	V	EFG	I	1.18448
1cho	I	K	13	13	W	EFG	I	1.00472
1cho	I	K	13	13	Y	EFG	I	1.05965
1cho	I	L	18	18	A	EFG	I	4.77875
1cho	I	L	18	18	C	EFG	I	2.60406
1cho	I	L	18	18	D	EFG	I	7.09689
1cho	I	L	18	18	E	EFG	I	6.65805
1cho	I	L	18	18	F	EFG	I	-1.47994
1cho	I	L	18	18	G	EFG	I	5.997
1cho	I	L	18	18	H	EFG	I	2.95713
1cho	I	L	18	18	I	EFG	I	4.41398
1cho	I	L	18	18	K	EFG	I	4.30983
1cho	I	L	18	18	M	EFG	I	0.347245
1cho	I	L	18	18	N	EFG	I	3.30828
1cho	I	L	18	18	P	EFG	I	8.67408
1cho	I	L	18	18	Q	EFG	I	3.20787
1cho	I	L	18	18	R	EFG	I	3.94842
1cho	I	L	18	18	S	EFG	I	4.91443
1cho	I	L	18	18	T	EFG	I	4.41974
1cho	I	L	18	18	V	EFG	I	4.21149
1cho	I	L	18	18	W	EFG	I	-1.66639
1cho	I	L	18	18	Y	EFG	I	-2.19276
1cho	I	N	28	28	S	EFG	I	0
1cho	I	N	36	36	A	EFG	I	-1.34436
1cho	I	N	36	36	C	EFG	I	-0.1109
1cho	I	N	36	36	D	EFG	I	-1.02497
1cho	I	N	36	36	E	EFG	I	2.29936
1cho	I	N	36	36	F	EFG	I	2.33298
1cho	I	N	36	36	G	EFG	I	-1.37396
1cho	I	N	36	36	H	EFG	I	-0.7248
1cho	I	N	36	36	I	EFG	I	-0.0296
1cho	I	N	36	36	K	EFG	I	2.29936
1cho	I	N	36	36	L	EFG	I	0.60792
1cho	I	N	36	36	M	EFG	I	-0.2054
1cho	I	N	36	36	P	EFG	I	-1.80737
1cho	I	N	36	36	Q	EFG	I	-0.18219
1cho	I	N	36	36	R	EFG	I	1.5661
1cho	I	N	36	36	S	EFG	I	-1.45526
1cho	I	N	36	36	T	EFG	I	-1.2793
1cho	I	N	36	36	V	EFG	I	0.03238
1cho	I	N	36	36	W	EFG	I	2.14705
1cho	I	N	36	36	Y	EFG	I	2.52884
1cho	I	P	14	14	A	EFG	I	0.3751
1cho	I	P	14	14	C	EFG	I	-0.96926
1cho	I	P	14	14	D	EFG	I	-0.83898
1cho	I	P	14	14	E	EFG	I	-0.70964
1cho	I	P	14	14	F	EFG	I	-0.30307
1cho	I	P	14	14	G	EFG	I	0.62719
1cho	I	P	14	14	H	EFG	I	-0.1109
1cho	I	P	14	14	I	EFG	I	-0.50364
1cho	I	P	14	14	K	EFG	I	0.3809
1cho	I	P	14	14	L	EFG	I	-0.51694
1cho	I	P	14	14	M	EFG	I	-0.81608
1cho	I	P	14	14	N	EFG	I	-0.76866
1cho	I	P	14	14	Q	EFG	I	-0.71717
1cho	I	P	14	14	R	EFG	I	0.39235
1cho	I	P	14	14	S	EFG	I	-0.43429
1cho	I	P	14	14	T	EFG	I	-0.54167
1cho	I	P	14	14	V	EFG	I	-0.54167
1cho	I	P	14	14	W	EFG	I	-0.2054
1cho	I	P	14	14	Y	EFG	I	-0.38936
1cho	I	R	21	21	A	EFG	I	3.14541
1cho	I	R	21	21	C	EFG	I	3.48007
1cho	I	R	21	21	D	EFG	I	3.72814
1cho	I	R	21	21	E	EFG	I	3.45671
1cho	I	R	21	21	F	EFG	I	2.91046
1cho	I	R	21	21	G	EFG	I	3.43548
1cho	I	R	21	21	H	EFG	I	2.75378
1cho	I	R	21	21	I	EFG	I	2.07863
1cho	I	R	21	21	K	EFG	I	0.65314
1cho	I	R	21	21	L	EFG	I	2.7894
1cho	I	R	21	21	M	EFG	I	2.57781
1cho	I	R	21	21	N	EFG	I	3.48007
1cho	I	R	21	21	P	EFG	I	7.18355
1cho	I	R	21	21	Q	EFG	I	2.44248
1cho	I	R	21	21	S	EFG	I	3.14032
1cho	I	R	21	21	T	EFG	I	2.6304
1cho	I	R	21	21	V	EFG	I	2.03609
1cho	I	R	21	21	W	EFG	I	2.40401
1cho	I	R	21	21	Y	EFG	I	2.95713
1cho	I	T	17	17	A	EFG	I	4.17647
1cho	I	T	17	17	C	EFG	I	3.28075
1cho	I	T	17	17	D	EFG	I	6.7218
1cho	I	T	17	17	E	EFG	I	5.57844
1cho	I	T	17	17	F	EFG	I	4.17174
1cho	I	T	17	17	G	EFG	I	5.21756
1cho	I	T	17	17	H	EFG	I	3.59879
1cho	I	T	17	17	I	EFG	I	3.59879
1cho	I	T	17	17	K	EFG	I	4.03308
1cho	I	T	17	17	L	EFG	I	4.35247
1cho	I	T	17	17	M	EFG	I	3.8975
1cho	I	T	17	17	N	EFG	I	4.25482
1cho	I	T	17	17	P	EFG	I	4.17174
1cho	I	T	17	17	Q	EFG	I	3.62839
1cho	I	T	17	17	R	EFG	I	3.82768
1cho	I	T	17	17	S	EFG	I	2.31641
1cho	I	T	17	17	V	EFG	I	3.37767
1cho	I	T	17	17	W	EFG	I	4.09813
1cho	I	T	17	17	Y	EFG	I	4.40817
1cho	I	Y	20	20	A	EFG	I	2.50652
1cho	I	Y	20	20	C	EFG	I	2.50652
1cho	I	Y	20	20	D	EFG	I	6.11407
1cho	I	Y	20	20	E	EFG	I	4.94315
1cho	I	Y	20	20	F	EFG	I	0.17841
1cho	I	Y	20	20	G	EFG	I	3.12998
1cho	I	Y	20	20	H	EFG	I	1.48776
1cho	I	Y	20	20	I	EFG	I	2.07863
1cho	I	Y	20	20	K	EFG	I	3.11946
1cho	I	Y	20	20	L	EFG	I	0.67451
1cho	I	Y	20	20	M	EFG	I	1.20878
1cho	I	Y	20	20	N	EFG	I	2.95713
1cho	I	Y	20	20	P	EFG	I	8.44125
1cho	I	Y	20	20	Q	EFG	I	3.10875
1cho	I	Y	20	20	R	EFG	I	2.86713
1cho	I	Y	20	20	S	EFG	I	2.82738
1cho	I	Y	20	20	T	EFG	I	3.25608
1cho	I	Y	20	20	V	EFG	I	3.41344
1cho	I	Y	20	20	W	EFG	I	0.38666
1cse	I	L	45	45	D	E	I	4.34777
1cse	I	L	45	45	E	E	I	2.34814
1cse	I	L	45	45	G	E	I	2.24746
1cse	I	L	45	45	I	E	I	2.93919
1cse	I	L	45	45	P	E	I	6.66719
1cse	I	L	45	45	S	E	I	1.17151
1dan	H	E	26	11	A	HL	UT	0.100645
1dan	H	G	43	27	A	HL	UT	0.06723
1dan	H	K	20	5	A	HL	UT	2.5403
1dan	H	K	20	5	R	HL	UT	1.68386
1dan	H	K	192	189	A	HL	UT	-0.18521
1dan	H	L	144	135	A	HL	UT	0.01568
1dan	H	M	164	154	A	HL	UT	0.73866
1dan	H	Q	110	98	A	HL	UT	1.30401
1dan	H	R	134	125	A	HL	UT	0.74317
1dan	H	S	195	192	A	HL	UT	-0.001445
1dan	H	Y	94	82	A	HL	UT	0.782293
1dan	L	E	99	89	A	HL	UT	-0.187695
1dan	L	F	76	66	A	HL	UT	1.14867
1dan	L	T	106	96	A	HL	UT	-0.05977
1dan	T	D	44	40	A	HL	UT	1.31316
1dan	T	D	58	54	A	HL	UT	2.08364
1dan	T	D	58	54	E	HL	UT	1.37876
1dan	T	D	61	57	A	HL	UT	0.24177
1dan	T	E	24	20	A	HL	UT	0.678575
1dan	T	E	62	58	A	HL	UT	0
1dan	T	F	50	46	A	HL	UT	0.43742
1dan	T	I	22	18	A	HL	UT	0.67218
1dan	T	I	38	34	A	HL	UT	-0.13148
1dan	T	I	63	59	A	HL	UT	0
1dan	T	K	15	11	A	HL	UT	-0.39845
1dan	T	K	28	24	A	HL	UT	0.10824
1dan	T	K	41	37	A	HL	UT	0.335605
1dan	T	K	46	42	A	HL	UT	0.45846
1dan	T	K	48	44	A	HL	UT	0.590253
1dan	T	K	68	64	A	HL	UT	-0.08515
1dan	T	L	59	55	A	HL	UT	0
1dan	T	L	72	68	A	HL	UT	-0.05977
1dan	T	N	18	14	A	HL	UT	0.190005
1dan	T	Q	37	33	A	HL	UT	0.617877
1dan	T	Q	69	65	A	HL	UT	0
1dan	T	S	16	12	A	HL	UT	-0.12966
1dan	T	S	42	38	A	HL	UT	-0.08461
1dan	T	S	47	43	A	HL	UT	-0.0126567
1dan	T	T	17	13	A	HL	UT	0.110205
1dan	T	T	21	17	A	HL	UT	-0.179415
1dan	T	T	52	48	A	HL	UT	0.402205
1dan	T	T	60	56	A	HL	UT	2.31106
1dan	T	V	33	29	A	HL	UT	-0.19309
1dan	T	V	36	32	A	HL	UT	-0.13148
1dan	T	V	64	60	A	HL	UT	0
1dan	T	W	14	10	F	HL	UT	0.69098
1dan	T	W	25	21	F	HL	UT	0.61451
1dan	T	W	45	41	A	HL	UT	1.96356
1dan	T	W	45	41	F	HL	UT	1.26918
1dan	T	Y	51	47	A	HL	UT	-0.13148
1dan	T	Y	78	74	A	HL	UT	0.65218
1dan	U	D	129	40	A	HL	UT	-0.01326
1dan	U	D	145	56	A	HL	UT	-0.00533
1dan	U	E	105	16	A	HL	UT	-0.05977
1dan	U	E	128	39	A	HL	UT	0.092855
1dan	U	E	208	119	A	HL	UT	-0.00482
1dan	U	F	140	51	A	HL	UT	1.74665
1dan	U	F	147	58	A	HL	UT	-0.05977
1dan	U	G	164	75	R	HL	UT	-0.16261
1dan	U	I	152	63	A	HL	UT	0.189295
1dan	U	K	122	33	A	HL	UT	-0.110555
1dan	U	K	169	80	A	HL	UT	0.10824
1dan	U	K	181	92	A	HL	UT	0.00852
1dan	U	L	133	44	A	HL	UT	-0.013765
1dan	U	L	176	87	A	HL	UT	0.08993
1dan	U	N	107	18	A	HL	UT	0
1dan	U	N	138	49	A	HL	UT	0
1dan	U	N	199	110	A	HL	UT	0
1dan	U	P	92	3	A	HL	UT	-0.19309
1dan	U	R	131	42	A	HL	UT	0
1dan	U	R	135	46	A	HL	UT	0.684593
1dan	U	R	136	47	A	HL	UT	-0.05977
1dan	U	R	144	55	A	HL	UT	-0.001445
1dan	U	R	196	107	A	HL	UT	0.46009
1dan	U	S	163	74	A	HL	UT	0.01131
1dan	U	T	132	43	A	HL	UT	0
1dan	U	T	139	50	A	HL	UT	-0.00828
1dan	U	T	167	78	A	HL	UT	0.205875
1dan	U	T	172	83	A	HL	UT	-0.01276
1dan	U	T	197	108	A	HL	UT	0.10972
1dan	U	T	203	114	A	HL	UT	0.11756
1dan	U	V	146	57	A	HL	UT	0.19932
1dan	U	V	179	90	A	HL	UT	0.10972
1dan	U	V	198	109	A	HL	UT	0.10972
1dan	U	V	207	118	A	HL	UT	0.39322
1dan	U	W	158	69	F	HL	UT	0.12276
1dan	U	Y	156	67	L	HL	UT	0.15689
1dan	U	Y	157	68	A	HL	UT	0
1dan	U	Y	185	96	A	HL	UT	-0.33975
1dqj	A	N	31	31	A	AB	C	2.01209
1dqj	A	N	32	32	A	AB	C	4.08795
1dqj	A	S	91	91	A	AB	C	1.43093
1dqj	A	Y	96	96	A	AB	C	1.13429
1dqj	B	D	32	32	A	AB	C	2.01209
1dqj	B	D	101	101	A	AB	C	1.37563
1dqj	B	W	98	98	A	AB	C	4.92823
1dqj	B	Y	33	33	A	AB	C	5.52078
1dqj	B	Y	53	53	A	AB	C	1.17949
1dqj	C	K	96	96	A	AB	C	6.15171
1dqj	C	K	97	97	A	AB	C	3.51736
1dqj	C	L	75	75	A	AB	C	1.45144
1dqj	C	N	93	93	A	AB	C	0.64944
1dqj	C	R	21	21	A	AB	C	1.21296
1dqj	C	S	100	100	A	AB	C	0.77507
1dqj	C	T	89	89	A	AB	C	0.84028
1dqj	C	W	62	62	A	AB	C	0.75757
1dqj	C	W	63	63	A	AB	C	1.34537
1dqj	C	Y	20	20	A	AB	C	3.28351
1dvf	A	H	30	30	A	AB	CD	1.67414
1dvf	A	S	93	93	A	AB	CD	1.18083
1dvf	A	W	92	92	A	AB	CD	0.32025
1dvf	A	Y	32	32	A	AB	CD	1.93765
1dvf	A	Y	49	49	A	AB	CD	1.91633
1dvf	A	Y	50	50	A	AB	CD	0.693655
1dvf	B	D	54	54	A	AB	CD	4.2856
1dvf	B	D	58	58	A	AB	CD	1.57447
1dvf	B	D	100	100	A	AB	CD	2.79177
1dvf	B	E	98	98	A	AB	CD	4.18923
1dvf	B	N	56	56	A	AB	CD	1.63722
1dvf	B	R	99	99	A	AB	CD	1.87339
1dvf	B	T	30	30	A	AB	CD	0.903455
1dvf	B	W	52	52	A	AB	CD	4.16512
1dvf	B	Y	101	101	F	AB	CD	2.00549
1dvf	D	D	52	52	A	AB	CD	1.69059
1dvf	D	H	33	33	A	AB	CD	1.87968
1dvf	D	I	97	101	A	AB	CD	2.67976
1dvf	D	K	30	30	A	AB	CD	1.00143
1dvf	D	N	54	55	A	AB	CD	1.85936
1dvf	D	Q	100	104	A	AB	CD	1.62764
1dvf	D	Y	98	102	A	AB	CD	4.73627
1dvf	D	Y	102	111	A	AB	CD	4.7
1e96	A	D	38	38	N	A	B	2.16262
1e96	A	I	33	33	N	A	B	2.00652
1e96	A	K	132	132	E	A	B	-0.18647
1e96	A	L	134	134	R	A	B	-0.12517
1e96	A	M	45	45	T	A	B	0.35947
1e96	A	N	26	26	H	A	B	1.08478
1eaw	A	D	96	91	A	A	B	0.65371
1eaw	A	D	217	214	A	A	B	2.22665
1eaw	A	E	169	163	A	A	B	0.7029
1eaw	A	F	94	89	A	A	B	0.72778
1eaw	A	F	97	92	A	A	B	0.89103
1eaw	A	H	143	138	A	A	B	-0.01446
1eaw	A	I	41	26	A	A	B	-0.82159
1eaw	A	I	60	45	A	A	B	-0.19414
1eaw	A	K	224	221	A	A	B	0.47552
1eaw	A	L	153	147	A	A	B	0.50159
1eaw	A	N	95	90	A	A	B	0.30775
1eaw	A	Q	38	23	A	A	B	-0.51833
1eaw	A	Q	145	140	A	A	B	0.30634
1eaw	A	Q	174	168	A	A	B	0.56446
1eaw	A	Q	175	169	A	A	B	-0.13295
1eaw	A	R	87	82	A	A	B	-0.14958
1eaw	A	R	222	219	A	A	B	-0.08845
1eaw	A	T	98	93	A	A	B	0.25446
1eaw	A	T	150	144	A	A	B	0.08935
1eaw	A	Y	146	141	A	A	B	0.50159
1efn	A	I	96	12	A	A	B	1.44941
1efn	A	T	97	13	H	A	B	1.24216
1emv	A	C	23	23	A	A	B	0.92094
1emv	A	D	26	26	A	A	B	0.33637
1emv	A	D	51	51	A	A	B	5.91153
1emv	A	D	60	60	A	A	B	0.51074
1emv	A	E	30	30	A	A	B	1.41506
1emv	A	E	31	31	A	A	B	0.30667
1emv	A	E	32	32	A	A	B	0.22014
1emv	A	E	41	41	A	A	B	2.08169
1emv	A	E	42	42	A	A	B	0.65741
1emv	A	E	45	45	A	A	B	0.21254
1emv	A	G	49	49	A	A	B	1.48439
1emv	A	H	46	46	A	A	B	0.83126
1emv	A	I	53	53	A	A	B	0.84718
1emv	A	K	35	35	A	A	B	0.19177
1emv	A	L	33	33	A	A	B	3.41547
1emv	A	L	36	36	A	A	B	0.90612
1emv	A	L	52	52	A	A	B	0.60065
1emv	A	N	24	24	A	A	B	0.13932
1emv	A	N	69	69	A	A	B	0.27769
1emv	A	P	47	47	A	A	B	0.43698
1emv	A	P	56	56	A	A	B	1.24145
1emv	A	S	28	28	A	A	B	0.17298
1emv	A	S	29	29	A	A	B	0.95537
1emv	A	S	48	48	A	A	B	0.00726
1emv	A	S	50	50	A	A	B	2.18578
1emv	A	S	63	63	A	A	B	0.86945
1emv	A	T	27	27	A	A	B	0.72765
1emv	A	T	38	38	A	A	B	0.89896
1emv	A	T	44	44	A	A	B	0.30449
1emv	A	V	34	34	A	A	B	2.57657
1emv	A	V	37	37	A	A	B	1.66276
1emv	A	V	68	68	A	A	B	1.85461
1emv	A	Y	54	54	A	A	B	4.83141
1emv	A	Y	55	55	A	A	B	4.63166
1emv	B	F	86	86	A	A	B	3.87635
1emv	B	K	97	97	A	A	B	1.95833
1emv	B	N	72	72	A	A	B	1.16389
1emv	B	N	75	75	A	A	B	2.33298
1emv	B	Q	92	92	A	A	B	-0.27742
1emv	B	R	54	54	A	A	B	1.66459
1emv	B	S	74	74	A	A	B	-0.24086
1emv	B	S	77	77	A	A	B	-0.23273
1emv	B	S	78	78	A	A	B	-0.53954
1emv	B	S	84	84	A	A	B	-0.10935
1emv	B	T	87	87	A	A	B	0.15833
1emv	B	V	98	98	A	A	B	1.08813
1f47	A	D	4	4	A	A	B	0.69074
1f47	A	D	7	7	A	A	B	1.73173
1f47	A	D	7	7	G	A	B	1.13807
1f47	A	D	7	7	S	A	B	2.06256
1f47	A	F	11	11	A	A	B	2.44276
1f47	A	I	8	8	A	A	B	2.51344
1f47	A	K	14	14	A	A	B	-0.04259
1f47	A	L	6	6	A	A	B	0.9244
1f47	A	L	12	12	A	A	B	2.29277
1f47	A	Q	15	15	A	A	B	-0.04554
1f47	A	Y	5	5	A	A	B	0.8684
1f47	B	D	2	2	A	A	B	0.7
1f5r	A	K	156	144	Q	A	I	-1.17007
1fc2	C	F	149	30	A	C	D	0.01365
1fc2	C	F	149	30	W	C	D	0
1fc2	C	I	135	16	W	C	D	3.1355
1fc2	C	K	154	35	A	C	D	1.37776
1fc2	C	L	136	17	D	C	D	1.12637
1fc2	C	L	163	44	W	C	D	0
1fc2	C	N	147	28	A	C	D	0.595553
1fc2	C	Y	133	14	W	C	D	0.4102
1fcc	C	D	40	40	A	A	C	0.285975
1fcc	C	E	27	27	A	A	C	4.9
1fcc	C	E	42	42	A	A	C	0.392505
1fcc	C	K	28	28	A	A	C	1.27738
1fcc	C	K	31	31	A	A	C	3.48684
1fcc	C	N	35	35	A	A	C	2.38124
1fcc	C	T	25	25	A	A	C	0.239975
1fcc	C	W	43	43	A	A	C	3.76898
1ffw	A	A	90	89	V	A	B	0.09123
1ffw	A	D	13	12	K	A	B	0.04737
1ffw	A	E	93	92	K	A	B	0.8204
1ffw	A	E	117	116	K	A	B	0.7125
1ffw	A	F	111	110	V	A	B	6.70536
1ffw	A	T	87	86	I	A	B	-0.31897
1ffw	A	T	112	111	I	A	B	0.56166
1ffw	A	V	108	107	M	A	B	1.13005
1ffw	A	Y	106	105	W	A	B	0.7125
1ffw	B	C	213	90	A	A	B	0.20407
1ffw	B	D	202	79	A	A	B	-0.07407
1ffw	B	D	207	84	A	A	B	0.09618
1ffw	B	E	171	48	A	A	B	0.71597
1ffw	B	E	178	55	A	A	B	0.63843
1ffw	B	F	214	91	A	A	B	3.64188
1ffw	B	H	181	58	A	A	B	0.03383
1ffw	B	I	216	93	A	A	B	0.42735
1fy8	E	D	194	184	N	E	I	0.17025
1fy8	E	Q	156	144	K	E	I	1.17007
1gc1	C	D	10	10	A	G	C	0
1gc1	C	D	53	53	A	G	C	0.30115
1gc1	C	D	56	56	A	G	C	-0.06985
1gc1	C	D	63	63	A	G	C	-0.319485
1gc1	C	D	88	88	A	G	C	-0.06985
1gc1	C	E	77	77	A	G	C	0.56083
1gc1	C	E	85	85	A	G	C	1.31591
1gc1	C	E	87	87	A	G	C	0.21881
1gc1	C	E	92	92	A	G	C	0.018105
1gc1	C	H	27	27	A	G	C	0.28112
1gc1	C	K	1	1	A	G	C	0.061175
1gc1	C	K	2	2	A	G	C	-0.018335
1gc1	C	K	7	7	A	G	C	0.99678
1gc1	C	K	8	8	A	G	C	0.102575
1gc1	C	K	21	21	A	G	C	-0.12898
1gc1	C	K	22	22	A	G	C	0.239975
1gc1	C	K	29	29	A	G	C	0.56282
1gc1	C	K	35	35	A	G	C	0.320855
1gc1	C	K	46	46	A	G	C	1.42942
1gc1	C	K	50	50	A	G	C	0.048685
1gc1	C	K	72	72	A	G	C	-0.018335
1gc1	C	K	75	75	A	G	C	0.158895
1gc1	C	K	90	90	A	G	C	0.048685
1gc1	C	L	44	44	A	G	C	1.04742
1gc1	C	L	51	51	A	G	C	1.23265
1gc1	C	N	30	30	A	G	C	0.170125
1gc1	C	N	32	32	A	G	C	0.181225
1gc1	C	N	39	39	A	G	C	0.462555
1gc1	C	N	52	52	A	G	C	0.703775
1gc1	C	N	66	66	A	G	C	-0.031915
1gc1	C	N	73	73	A	G	C	-0.10895
1gc1	C	Q	20	20	A	G	C	-0.018335
1gc1	C	Q	25	25	A	G	C	0.031
1gc1	C	Q	33	33	A	G	C	0.102575
1gc1	C	Q	40	40	A	G	C	-0.4101
1gc1	C	Q	64	64	A	G	C	0.4411
1gc1	C	Q	89	89	A	G	C	0.170125
1gc1	C	Q	89	89	L	G	C	-0.31058
1gc1	C	Q	94	94	A	G	C	-0.1079
1gc1	C	R	58	58	A	G	C	0.131025
1gc1	C	R	59	59	A	G	C	1.1673
1gc1	C	S	19	19	A	G	C	0
1gc1	C	S	23	23	A	G	C	0.29118
1gc1	C	S	31	31	A	G	C	0.102575
1gc1	C	S	42	42	A	G	C	0
1gc1	C	S	49	49	A	G	C	0.605245
1gc1	C	S	60	60	A	G	C	-0.089245
1gc1	C	T	11	11	A	G	C	0
1gc1	C	T	15	15	A	G	C	0.320855
1gc1	C	T	17	17	A	G	C	-0.12796
1gc1	C	T	45	45	A	G	C	-0.149365
1gc1	C	T	81	81	A	G	C	1.5
1gc1	C	V	86	86	A	G	C	-0.06985
1gc1	C	Y	82	82	A	G	C	1.28924
1gc1	G	E	91	13	A	G	C	-0.12898
1gcq	C	A	632	42	G	AB	C	1.35199
1gcq	C	G	611	21	V	AB	C	-0.02519
1gcq	C	P	595	5	A	AB	C	0.76698
1gcq	C	P	608	18	A	AB	C	0.12067
1gcq	C	P	609	19	A	AB	C	0.08516
1gcq	C	P	657	67	A	AB	C	1.31499
1gcq	C	W	637	47	Y	AB	C	2.14485
1gl1	I	L	30	30	V	A	I	4.25449
1grn	A	D	38	38	E	A	B	0.38943
1h9d	B	G	61	60	A	A	B	1.90106
1h9d	B	L	103	102	A	A	B	0.86036
1h9d	B	N	104	103	A	A	B	2.1087
1h9d	B	Q	67	66	A	A	B	1.24833
1h9d	B	R	3	2	A	A	B	1.0635
1h9d	B	V	4	3	A	A	B	1.28332
1iar	A	E	9	9	Q	A	B	3.11645
1iar	A	E	19	19	A	A	B	-0.3198
1iar	A	E	19	19	R	A	B	-0.11673
1iar	A	F	82	82	A	A	B	-0.083185
1iar	A	F	82	82	D	A	B	-0.57996
1iar	A	I	5	5	A	A	B	1.18003
1iar	A	I	5	5	R	A	B	0.79521
1iar	A	I	11	11	A	A	B	0.069445
1iar	A	K	12	12	E	A	B	0.13932
1iar	A	K	12	12	S	A	B	-0.0274
1iar	A	K	77	77	A	A	B	0.15679
1iar	A	K	77	77	E	A	B	0.61114
1iar	A	K	84	84	A	A	B	0.347295
1iar	A	K	84	84	D	A	B	1.878
1iar	A	N	15	15	A	A	B	-0.036915
1iar	A	N	15	15	D	A	B	-0.07798
1iar	A	N	89	89	A	A	B	1.56853
1iar	A	Q	8	8	A	A	B	-0.011165
1iar	A	Q	8	8	R	A	B	0.03888
1iar	A	Q	78	78	A	A	B	0.12735
1iar	A	Q	78	78	E	A	B	0.2448
1iar	A	R	53	53	Q	A	B	0.837415
1iar	A	R	81	81	A	A	B	0.479545
1iar	A	R	81	81	E	A	B	1.4601
1iar	A	R	85	85	A	A	B	0.428205
1iar	A	R	85	85	E	A	B	1.22324
1iar	A	R	88	88	A	A	B	3.75053
1iar	A	R	88	88	Q	A	B	2.82793
1iar	A	S	16	16	A	A	B	-0.176275
1iar	A	S	16	16	D	A	B	-0.10353
1iar	A	T	6	6	A	A	B	-0.091765
1iar	A	T	6	6	D	A	B	1.39118
1iar	A	T	13	13	A	A	B	0.978745
1iar	A	T	13	13	D	A	B	-0.21843
1iar	A	W	91	91	A	A	B	0.72936
1iar	A	W	91	91	D	A	B	1.30515
1iar	B	D	66	66	A	A	B	0.73
1iar	B	D	67	67	A	A	B	2.36
1iar	B	D	72	72	A	A	B	4.35
1iar	B	D	125	125	A	A	B	0.8
1iar	B	F	41	41	A	A	B	2.26
1iar	B	K	91	91	A	A	B	0.53
1iar	B	L	39	39	A	A	B	2.77
1iar	B	L	42	42	A	A	B	0
1iar	B	L	43	43	A	A	B	0.33
1iar	B	L	128	128	A	A	B	1.11
1iar	B	M	14	14	A	A	B	0.17
1iar	B	N	73	73	A	A	B	0.28
1iar	B	N	126	126	A	A	B	0.68
1iar	B	P	92	92	A	A	B	1.44
1iar	B	S	15	15	A	A	B	0.04
1iar	B	S	70	70	A	A	B	-0.24
1iar	B	S	93	93	A	A	B	-0.18
1iar	B	V	68	68	A	A	B	0.84
1iar	B	V	69	69	A	A	B	2.1
1iar	B	Y	13	13	A	A	B	5.22
1iar	B	Y	13	13	F	A	B	1.91
1iar	B	Y	74	74	A	A	B	2.73
1iar	B	Y	127	127	A	A	B	2.17
1iar	B	Y	127	127	F	A	B	-0.18
1iar	B	Y	129	129	A	A	B	0.28
1iar	B	Y	183	183	A	A	B	3.68
1iar	B	Y	183	183	F	A	B	3.16
1jck	A	P	176	172	A	A	B	1.9
1jck	A	T	20	18	A	A	B	1.5265
1jck	A	Y	90	87	A	A	B	2.54662
1jck	B	F	176	176	A	A	B	2.13155
1jck	B	K	103	103	A	A	B	0.53794
1jck	B	N	23	23	A	A	B	2.5
1jck	B	N	60	60	A	A	B	1.47039
1jck	B	V	91	91	A	A	B	2.16521
1jck	B	Y	26	26	A	A	B	1.73643
1jrh	H	D	54	56	A	LH	I	1.89242
1jrh	H	D	55	57	A	LH	I	1.68247
1jrh	H	D	56	58	A	LH	I	1.82671
1jrh	H	R	95	100	A	LH	I	0.541125
1jrh	H	W	52	54	A	LH	I	2.69224
1jrh	H	W	53	55	A	LH	I	2.40985
1jrh	H	Y	32	32	A	LH	I	1.41617
1jrh	H	Y	58	60	A	LH	I	1.22737
1jrh	H	Y	99	104	A	LH	I	1.08018
1jrh	I	E	45	45	Q	LH	I	0.0995
1jrh	I	K	47	47	A	LH	I	3.67426
1jrh	I	K	47	47	M	LH	I	3.29013
1jrh	I	K	52	52	A	LH	I	3.25571
1jrh	I	K	52	52	M	LH	I	4.90835
1jrh	I	K	98	98	A	LH	I	0.311885
1jrh	I	N	48	48	A	LH	I	0.0135633
1jrh	I	N	48	48	Q	LH	I	0.534115
1jrh	I	N	53	53	A	LH	I	4.16464
1jrh	I	N	79	79	A	LH	I	-0.266267
1jrh	I	R	84	84	A	LH	I	0.16157
1jrh	I	S	54	54	A	LH	I	0.35164
1jrh	I	T	14	14	V	LH	I	-0.02555
1jrh	I	V	51	51	A	LH	I	1.75202
1jrh	I	W	56	56	F	LH	I	-0.252445
1jrh	I	W	56	56	Y	LH	I	0.29833
1jrh	I	W	82	82	A	LH	I	4.45073
1jrh	I	W	82	82	F	LH	I	1.10197
1jrh	I	W	82	82	Y	LH	I	1.18704
1jrh	I	Y	49	49	A	LH	I	3.48318
1jrh	I	Y	49	49	F	LH	I	0.908175
1jrh	L	D	28	28	A	LH	I	0.43718
1jrh	L	E	27	27	A	LH	I	0.541125
1jrh	L	E	55	55	A	LH	I	-0.510273
1jrh	L	E	55	55	P	LH	I	-3.78565
1jrh	L	F	98	97	A	LH	I	0
1jrh	L	G	50	50	A	LH	I	4.44727
1jrh	L	S	93	93	A	LH	I	-0.650075
1jrh	L	T	94	94	A	LH	I	0.382505
1jrh	L	W	92	92	A	LH	I	2.80827
1jrh	L	W	96	95	A	LH	I	1.68247
1jrh	L	Y	30	30	A	LH	I	1.10386
1jrh	L	Y	91	91	A	LH	I	0.580225
1jtg	A	D	163	138	A	A	B	-1.34472
1jtg	A	D	163	138	K	A	B	-1.98528
1jtg	A	E	104	79	K	A	B	4.23067
1jtg	A	E	110	85	A	A	B	4.0574
1jtg	A	G	238	213	S	A	B	-1.63013
1jtg	A	K	234	209	A	A	B	1.22076
1jtg	A	R	243	218	A	A	B	1.30112
1jtg	A	S	130	105	A	A	B	0.562285
1jtg	A	S	235	210	A	A	B	1.2377
1jtg	A	T	140	115	K	A	B	-0.01219
1jtg	A	Y	105	80	A	A	B	-0.16818
1jtg	B	K	74	74	A	A	B	4.3
1jtg	B	N	89	89	K	A	B	-0.45721
1jtg	B	T	32	32	K	A	B	0.19956
1jtg	B	V	93	93	K	A	B	-0.477595
1jtg	B	Y	143	143	A	A	B	1.89816
1kac	A	P	417	15	S	A	B	-0.7925
1kac	A	S	489	87	Y	A	B	-1.25136
1ktz	A	R	25	25	A	A	B	1.47993
1ktz	A	R	25	25	K	A	B	1.15041
1ktz	A	R	94	94	A	A	B	2.88119
1ktz	A	R	94	94	K	A	B	2.19904
1ktz	A	V	92	92	I	A	B	0.24265
1ktz	B	D	32	18	A	A	B	1.966
1ktz	B	D	32	18	N	A	B	2.44419
1ktz	B	D	118	104	A	A	B	1.25991
1ktz	B	E	55	41	A	A	B	1.66124
1ktz	B	E	75	61	A	A	B	1.52499
1ktz	B	E	119	105	A	A	B	1.93869
1ktz	B	E	119	105	Q	A	B	2.07144
1ktz	B	F	30	16	A	A	B	3.42282
1ktz	B	F	110	96	A	A	B	1.37726
1ktz	B	H	79	65	A	A	B	0.74137
1ktz	B	I	50	36	A	A	B	2.34044
1ktz	B	I	53	39	A	A	B	1.81479
1ktz	B	I	125	111	A	A	B	0.98484
1ktz	B	L	27	13	A	A	B	2.26896
1ktz	B	M	112	98	A	A	B	1.31651
1ktz	B	N	47	33	A	A	B	0.73071
1ktz	B	S	49	35	A	A	B	0.77226
1ktz	B	S	52	38	A	A	B	0.66235
1ktz	B	S	52	38	L	A	B	4.47936
1ktz	B	T	51	37	A	A	B	1.95794
1ktz	B	V	62	48	A	A	B	1.09332
1ktz	B	V	77	63	A	A	B	0.86061
1lfd	A	D	51	38	A	A	B	-0.57842
1lfd	A	D	51	38	K	A	B	-1.08527
1lfd	A	D	56	43	A	A	B	-0.27937
1lfd	A	D	58	45	K	A	B	-0.90555
1lfd	A	D	94	81	K	A	B	-1.1455
1lfd	A	E	57	44	A	A	B	-0.24608
1lfd	A	E	57	44	K	A	B	-0.28428
1lfd	A	K	32	19	A	A	B	1.32486
1lfd	A	K	48	35	A	A	B	0.25798
1lfd	A	K	52	39	A	A	B	1.17799
1lfd	A	L	23	10	K	A	B	-0.01545
1lfd	A	L	55	42	K	A	B	-0.57036
1lfd	A	M	30	17	K	A	B	-0.91981
1lfd	A	N	27	14	K	A	B	0.40252
1lfd	A	N	54	41	K	A	B	-1.16703
1lfd	A	N	92	79	K	A	B	-0.56242
1lfd	A	R	20	7	A	A	B	1.13478
1lfd	A	S	22	9	K	A	B	-0.11774
1lfd	A	Y	93	80	K	A	B	0.07711
1mah	A	D	74	74	N	A	F	1.87832
1mah	A	F	295	295	L	A	F	1.24419
1mah	A	F	297	297	I	A	F	2.05911
1mah	A	F	297	297	Y	A	F	0.79151
1mah	A	F	338	338	G	A	F	0.79151
1mah	A	W	286	286	R	A	F	8.80345
1mah	A	Y	72	72	N	A	F	5.21423
1mah	A	Y	124	124	Q	A	F	3.00227
1mah	A	Y	337	337	A	A	F	0.38626
1n8o	E	M	84	84	K	ABC	E	1.45809
1n8o	E	M	84	84	L	ABC	E	-0.06235
1n8o	E	M	84	84	R	ABC	E	1.34767
1nca	H	D	97	101	K	N	LH	0.71368
1nca	H	E	96	100	D	N	LH	0.4102
1nca	H	N	31	31	Q	N	LH	0
1nca	H	N	98	102	Q	N	LH	0.54225
1nmb	H	D	56	57	E	N	LH	2.95166
1nmb	H	D	56	57	N	N	LH	2.95166
1nmb	H	Y	99	103	A	N	LH	2.13919
1nmb	L	L	94	94	V	N	LH	0.89942
1nmb	L	Y	32	32	F	N	LH	0.46601
1nmb	N	T	93	94	F	N	LH	-0.02389
1nmb	N	T	93	94	W	N	LH	0.18407
1ppf	E	R	21	6	A	E	I	0.20503
1ppf	E	R	21	6	C	E	I	-0.08
1ppf	E	R	21	6	D	E	I	0.20503
1ppf	E	R	21	6	E	E	I	0.45416
1ppf	E	R	21	6	F	E	I	-0.967
1ppf	E	R	21	6	G	E	I	0.56953
1ppf	E	R	21	6	H	E	I	-0.48551
1ppf	E	R	21	6	I	E	I	-0.7995
1ppf	E	R	21	6	K	E	I	0.59578
1ppf	E	R	21	6	L	E	I	-0.84612
1ppf	E	R	21	6	M	E	I	-0.74858
1ppf	E	R	21	6	N	E	I	0.32469
1ppf	E	R	21	6	P	E	I	6.60819
1ppf	E	R	21	6	Q	E	I	-0.01808
1ppf	E	R	21	6	S	E	I	0.41353
1ppf	E	R	21	6	T	E	I	-0.01808
1ppf	E	R	21	6	V	E	I	-0.34453
1ppf	E	R	21	6	W	E	I	-0.52527
1ppf	E	R	21	6	Y	E	I	0.21743
1ppf	I	A	15	15	C	E	I	-0.66392
1ppf	I	A	15	15	D	E	I	1.1217
1ppf	I	A	15	15	E	E	I	0.10407
1ppf	I	A	15	15	F	E	I	-0.07189
1ppf	I	A	15	15	G	E	I	1.1217
1ppf	I	A	15	15	H	E	I	0.54486
1ppf	I	A	15	15	I	E	I	0.32469
1ppf	I	A	15	15	K	E	I	1.11118
1ppf	I	A	15	15	L	E	I	0.01753
1ppf	I	A	15	15	M	E	I	-0.39551
1ppf	I	A	15	15	N	E	I	0.90218
1ppf	I	A	15	15	P	E	I	1.96648
1ppf	I	A	15	15	Q	E	I	0.24615
1ppf	I	A	15	15	R	E	I	-0.26034
1ppf	I	A	15	15	S	E	I	0.74549
1ppf	I	A	15	15	T	E	I	0.94885
1ppf	I	A	15	15	V	E	I	0.197415
1ppf	I	A	15	15	W	E	I	-0.63154
1ppf	I	A	15	15	Y	E	I	-0.18238
1ppf	I	E	19	19	A	E	I	1.18581
1ppf	I	E	19	19	C	E	I	1.38226
1ppf	I	E	19	19	D	E	I	0.56953
1ppf	I	E	19	19	F	E	I	1.34436
1ppf	I	E	19	19	G	E	I	2.08985
1ppf	I	E	19	19	H	E	I	0.68044
1ppf	I	E	19	19	I	E	I	0.71282
1ppf	I	E	19	19	K	E	I	2.08985
1ppf	I	E	19	19	L	E	I	1.05553
1ppf	I	E	19	19	M	E	I	1.13203
1ppf	I	E	19	19	N	E	I	1.19508
1ppf	I	E	19	19	P	E	I	3.16376
1ppf	I	E	19	19	Q	E	I	0.65084
1ppf	I	E	19	19	R	E	I	1.44843
1ppf	I	E	19	19	S	E	I	1.8194
1ppf	I	E	19	19	T	E	I	1.48312
1ppf	I	E	19	19	V	E	I	1.14219
1ppf	I	E	19	19	W	E	I	1.50786
1ppf	I	E	19	19	Y	E	I	1.23075
1ppf	I	G	32	32	A	E	I	0.25385
1ppf	I	G	32	32	C	E	I	1.16198
1ppf	I	G	32	32	D	E	I	2.46082
1ppf	I	G	32	32	E	E	I	1.43639
1ppf	I	G	32	32	F	E	I	1.46022
1ppf	I	G	32	32	H	E	I	1.48312
1ppf	I	G	32	32	I	E	I	4.30882
1ppf	I	G	32	32	K	E	I	3.25825
1ppf	I	G	32	32	L	E	I	3.08444
1ppf	I	G	32	32	M	E	I	2.16345
1ppf	I	G	32	32	N	E	I	1.59051
1ppf	I	G	32	32	P	E	I	0.25999
1ppf	I	G	32	32	Q	E	I	2.75907
1ppf	I	G	32	32	R	E	I	4.77857
1ppf	I	G	32	32	S	E	I	0.90218
1ppf	I	G	32	32	T	E	I	2.77156
1ppf	I	G	32	32	V	E	I	2.51117
1ppf	I	G	32	32	W	E	I	1.6201
1ppf	I	G	32	32	Y	E	I	1.18581
1ppf	I	K	13	13	A	E	I	0.74549
1ppf	I	K	13	13	C	E	I	0.94885
1ppf	I	K	13	13	D	E	I	0.62212
1ppf	I	K	13	13	E	E	I	1.11646
1ppf	I	K	13	13	F	E	I	0.94885
1ppf	I	K	13	13	G	E	I	1.23075
1ppf	I	K	13	13	H	E	I	0.99983
1ppf	I	K	13	13	I	E	I	0.62212
1ppf	I	K	13	13	L	E	I	0.39572
1ppf	I	K	13	13	M	E	I	0.20503
1ppf	I	K	13	13	N	E	I	0.65084
1ppf	I	K	13	13	P	E	I	1.2478
1ppf	I	K	13	13	Q	E	I	0.24615
1ppf	I	K	13	13	R	E	I	-0.63154
1ppf	I	K	13	13	S	E	I	0.45416
1ppf	I	K	13	13	T	E	I	0.1635
1ppf	I	K	13	13	V	E	I	0.85885
1ppf	I	K	13	13	W	E	I	0.81909
1ppf	I	K	13	13	Y	E	I	0.49824
1ppf	I	L	18	18	A	E	I	1.00219
1ppf	I	L	18	18	C	E	I	-0.08822
1ppf	I	L	18	18	D	E	I	7.50292
1ppf	I	L	18	18	E	E	I	6.96086
1ppf	I	L	18	18	F	E	I	5.09442
1ppf	I	L	18	18	G	E	I	3.2845
1ppf	I	L	18	18	H	E	I	6.37727
1ppf	I	L	18	18	I	E	I	-0.72224
1ppf	I	L	18	18	K	E	I	5.61021
1ppf	I	L	18	18	M	E	I	1.22402
1ppf	I	L	18	18	N	E	I	5.14954
1ppf	I	L	18	18	P	E	I	6.05788
1ppf	I	L	18	18	Q	E	I	3.2989
1ppf	I	L	18	18	R	E	I	7.0802
1ppf	I	L	18	18	S	E	I	3.04712
1ppf	I	L	18	18	T	E	I	0.90218
1ppf	I	L	18	18	V	E	I	-0.48551
1ppf	I	L	18	18	W	E	I	7.43462
1ppf	I	L	18	18	Y	E	I	6.53942
1ppf	I	N	36	36	A	E	I	-1.62163
1ppf	I	N	36	36	C	E	I	0.59578
1ppf	I	N	36	36	D	E	I	-3.03325
1ppf	I	N	36	36	E	E	I	-1.00356
1ppf	I	N	36	36	F	E	I	1.8194
1ppf	I	N	36	36	G	E	I	-0.56324
1ppf	I	N	36	36	H	E	I	-0.52527
1ppf	I	N	36	36	I	E	I	0.85885
1ppf	I	N	36	36	K	E	I	2.58369
1ppf	I	N	36	36	L	E	I	2.60872
1ppf	I	N	36	36	M	E	I	1.07843
1ppf	I	N	36	36	P	E	I	-2.91662
1ppf	I	N	36	36	Q	E	I	0.37736
1ppf	I	N	36	36	R	E	I	1.8426
1ppf	I	N	36	36	S	E	I	-1.32683
1ppf	I	N	36	36	T	E	I	0.54486
1ppf	I	N	36	36	V	E	I	0.3408
1ppf	I	N	36	36	W	E	I	1.70276
1ppf	I	N	36	36	Y	E	I	1.65249
1ppf	I	P	14	14	A	E	I	-0.12233
1ppf	I	P	14	14	C	E	I	-1.9759
1ppf	I	P	14	14	D	E	I	-0.48551
1ppf	I	P	14	14	E	E	I	-1.40825
1ppf	I	P	14	14	F	E	I	-1.82987
1ppf	I	P	14	14	G	E	I	0.09203
1ppf	I	P	14	14	H	E	I	-1.73987
1ppf	I	P	14	14	I	E	I	-1.62738
1ppf	I	P	14	14	K	E	I	-0.44218
1ppf	I	P	14	14	L	E	I	-2.88091
1ppf	I	P	14	14	M	E	I	-1.55159
1ppf	I	P	14	14	N	E	I	-0.63154
1ppf	I	P	14	14	Q	E	I	-0.7995
1ppf	I	P	14	14	R	E	I	-0.13565
1ppf	I	P	14	14	S	E	I	-0.56324
1ppf	I	P	14	14	T	E	I	-0.26034
1ppf	I	P	14	14	V	E	I	-1.50291
1ppf	I	P	14	14	W	E	I	-1.9759
1ppf	I	P	14	14	Y	E	I	-0.94864
1ppf	I	T	17	17	A	E	I	3.14321
1ppf	I	T	17	17	C	E	I	2.05718
1ppf	I	T	17	17	D	E	I	4.85217
1ppf	I	T	17	17	E	E	I	3.01319
1ppf	I	T	17	17	F	E	I	1.68516
1ppf	I	T	17	17	G	E	I	3.54757
1ppf	I	T	17	17	H	E	I	1.66905
1ppf	I	T	17	17	I	E	I	1.47179
1ppf	I	T	17	17	K	E	I	3.33956
1ppf	I	T	17	17	L	E	I	2.24654
1ppf	I	T	17	17	M	E	I	2.46606
1ppf	I	T	17	17	N	E	I	2.65952
1ppf	I	T	17	17	P	E	I	3.02952
1ppf	I	T	17	17	Q	E	I	1.94014
1ppf	I	T	17	17	R	E	I	3.40154
1ppf	I	T	17	17	S	E	I	1.50864
1ppf	I	T	17	17	V	E	I	1.49069
1ppf	I	T	17	17	W	E	I	2.16345
1ppf	I	T	17	17	Y	E	I	2.44483
1ppf	I	Y	20	20	A	E	I	3.16376
1ppf	I	Y	20	20	C	E	I	3.40154
1ppf	I	Y	20	20	D	E	I	6.32629
1ppf	I	Y	20	20	E	E	I	6.32629
1ppf	I	Y	20	20	F	E	I	0.47504
1ppf	I	Y	20	20	G	E	I	4.12511
1ppf	I	Y	20	20	H	E	I	2.38067
1ppf	I	Y	20	20	I	E	I	3.87453
1ppf	I	Y	20	20	K	E	I	4.4288
1ppf	I	Y	20	20	L	E	I	1.35494
1ppf	I	Y	20	20	M	E	I	2.77156
1ppf	I	Y	20	20	N	E	I	3.5909
1ppf	I	Y	20	20	P	E	I	5.28922
1ppf	I	Y	20	20	Q	E	I	4.62886
1ppf	I	Y	20	20	R	E	I	4.30882
1ppf	I	Y	20	20	S	E	I	3.5909
1ppf	I	Y	20	20	T	E	I	4.98193
1ppf	I	Y	20	20	V	E	I	4.12511
1ppf	I	Y	20	20	W	E	I	0.23196
1r0r	I	A	15	10	C	E	I	-0.47645
1r0r	I	A	15	10	D	E	I	5.1525
1r0r	I	A	15	10	E	E	I	4.51137
1r0r	I	A	15	10	F	E	I	-2.21043
1r0r	I	A	15	10	G	E	I	1.09559
1r0r	I	A	15	10	H	E	I	1.74905
1r0r	I	A	15	10	I	E	I	-1.77338
1r0r	I	A	15	10	K	E	I	3.02836
1r0r	I	A	15	10	L	E	I	-1.72952
1r0r	I	A	15	10	M	E	I	-1.71436
1r0r	I	A	15	10	N	E	I	2.0649
1r0r	I	A	15	10	P	E	I	3.29677
1r0r	I	A	15	10	Q	E	I	1.78468
1r0r	I	A	15	10	R	E	I	5.45016
1r0r	I	A	15	10	S	E	I	1.71638
1r0r	I	A	15	10	T	E	I	1.24971
1r0r	I	A	15	10	V	E	I	-0.956005
1r0r	I	A	15	10	W	E	I	0.20406
1r0r	I	A	15	10	Y	E	I	-0.82631
1r0r	I	E	19	14	A	E	I	2.05909
1r0r	I	E	19	14	C	E	I	2.33714
1r0r	I	E	19	14	D	E	I	0.25498
1r0r	I	E	19	14	F	E	I	3.56555
1r0r	I	E	19	14	G	E	I	2.67261
1r0r	I	E	19	14	H	E	I	1.684
1r0r	I	E	19	14	I	E	I	0.72629
1r0r	I	E	19	14	K	E	I	2.67261
1r0r	I	E	19	14	L	E	I	0.56138
1r0r	I	E	19	14	M	E	I	1.54842
1r0r	I	E	19	14	N	E	I	2.08758
1r0r	I	E	19	14	P	E	I	3.70981
1r0r	I	E	19	14	Q	E	I	1.26355
1r0r	I	E	19	14	R	E	I	2.0649
1r0r	I	E	19	14	S	E	I	3.12904
1r0r	I	E	19	14	T	E	I	4.19052
1r0r	I	E	19	14	V	E	I	0.0934
1r0r	I	E	19	14	W	E	I	1.82265
1r0r	I	E	19	14	Y	E	I	1.86241
1r0r	I	G	32	27	A	E	I	1.2955
1r0r	I	G	32	27	C	E	I	1.39928
1r0r	I	G	32	27	D	E	I	2.84616
1r0r	I	G	32	27	E	E	I	1.95241
1r0r	I	G	32	27	F	E	I	0.11336
1r0r	I	G	32	27	H	E	I	2.16065
1r0r	I	G	32	27	I	E	I	1.95241
1r0r	I	G	32	27	K	E	I	2.89278
1r0r	I	G	32	27	L	E	I	2.37573
1r0r	I	G	32	27	M	E	I	2.12526
1r0r	I	G	32	27	N	E	I	1.26355
1r0r	I	G	32	27	P	E	I	1.06436
1r0r	I	G	32	27	Q	E	I	2.00339
1r0r	I	G	32	27	R	E	I	3.42071
1r0r	I	G	32	27	S	E	I	0.89853
1r0r	I	G	32	27	T	E	I	1.6544
1r0r	I	G	32	27	V	E	I	1.92908
1r0r	I	G	32	27	W	E	I	1.38092
1r0r	I	G	32	27	Y	E	I	0.47829
1r0r	I	K	13	8	A	E	I	-0.60114
1r0r	I	K	13	8	C	E	I	-0.60673
1r0r	I	K	13	8	D	E	I	-0.58469
1r0r	I	K	13	8	E	E	I	-0.10884
1r0r	I	K	13	8	F	E	I	-0.78298
1r0r	I	K	13	8	G	E	I	-0.82631
1r0r	I	K	13	8	H	E	I	-0.58469
1r0r	I	K	13	8	I	E	I	1.10763
1r0r	I	K	13	8	L	E	I	-0.32327
1r0r	I	K	13	8	M	E	I	-0.55313
1r0r	I	K	13	8	N	E	I	-0.38516
1r0r	I	K	13	8	P	E	I	1.32825
1r0r	I	K	13	8	Q	E	I	-0.52318
1r0r	I	K	13	8	R	E	I	0.13424
1r0r	I	K	13	8	S	E	I	-0.3029
1r0r	I	K	13	8	T	E	I	0.87683
1r0r	I	K	13	8	V	E	I	0.40469
1r0r	I	K	13	8	W	E	I	-1.08938
1r0r	I	K	13	8	Y	E	I	-0.68533
1r0r	I	L	18	13	A	E	I	0.414045
1r0r	I	L	18	13	C	E	I	-1.32675
1r0r	I	L	18	13	D	E	I	4.4734
1r0r	I	L	18	13	E	E	I	2.11943
1r0r	I	L	18	13	F	E	I	0.60805
1r0r	I	L	18	13	G	E	I	2.31872
1r0r	I	L	18	13	H	E	I	0.56138
1r0r	I	L	18	13	I	E	I	3.20677
1r0r	I	L	18	13	K	E	I	3.04943
1r0r	I	L	18	13	M	E	I	-0.50876
1r0r	I	L	18	13	N	E	I	1.4786
1r0r	I	L	18	13	P	E	I	7.57608
1r0r	I	L	18	13	Q	E	I	0.584715
1r0r	I	L	18	13	R	E	I	2.89278
1r0r	I	L	18	13	S	E	I	1.54842
1r0r	I	L	18	13	T	E	I	0.15744
1r0r	I	L	18	13	V	E	I	2.12526
1r0r	I	L	18	13	W	E	I	1.5018
1r0r	I	L	18	13	Y	E	I	0.44032
1r0r	I	N	28	23	S	E	I	-0.06506
1r0r	I	N	36	31	A	E	I	-0.03267
1r0r	I	N	36	31	C	E	I	0.56138
1r0r	I	N	36	31	D	E	I	0.56138
1r0r	I	N	36	31	E	E	I	-0.20204
1r0r	I	N	36	31	F	E	I	-0.1773
1r0r	I	N	36	31	G	E	I	0.28132
1r0r	I	N	36	31	H	E	I	0.28132
1r0r	I	N	36	31	I	E	I	0.31004
1r0r	I	N	36	31	K	E	I	1.13099
1r0r	I	N	36	31	L	E	I	1.52412
1r0r	I	N	36	31	M	E	I	0.31004
1r0r	I	N	36	31	P	E	I	1.45772
1r0r	I	N	36	31	Q	E	I	-0.27045
1r0r	I	N	36	31	R	E	I	1.43775
1r0r	I	N	36	31	S	E	I	0.47829
1r0r	I	N	36	31	T	E	I	0.56138
1r0r	I	N	36	31	V	E	I	0.65903
1r0r	I	N	36	31	W	E	I	0.05492
1r0r	I	N	36	31	Y	E	I	0.17976
1r0r	I	P	14	9	A	E	I	-0.62963
1r0r	I	P	14	9	C	E	I	-0.97234
1r0r	I	P	14	9	D	E	I	-2.48466
1r0r	I	P	14	9	E	E	I	-2.21043
1r0r	I	P	14	9	F	E	I	1.36196
1r0r	I	P	14	9	G	E	I	-0.3408
1r0r	I	P	14	9	H	E	I	-0.21337
1r0r	I	P	14	9	I	E	I	1.71638
1r0r	I	P	14	9	K	E	I	0.33964
1r0r	I	P	14	9	L	E	I	1.16706
1r0r	I	P	14	9	M	E	I	-0.03267
1r0r	I	P	14	9	N	E	I	-0.90404
1r0r	I	P	14	9	Q	E	I	-1.39408
1r0r	I	P	14	9	R	E	I	1.0864
1r0r	I	P	14	9	S	E	I	0.13424
1r0r	I	P	14	9	T	E	I	1.18036
1r0r	I	P	14	9	V	E	I	1.31169
1r0r	I	P	14	9	W	E	I	0.47829
1r0r	I	P	14	9	Y	E	I	0.84501
1r0r	I	R	21	16	A	E	I	-0.09465
1r0r	I	R	21	16	C	E	I	0.11336
1r0r	I	R	21	16	D	E	I	-0.1773
1r0r	I	R	21	16	E	E	I	0.33964
1r0r	I	R	21	16	F	E	I	0.44032
1r0r	I	R	21	16	G	E	I	2.05909
1r0r	I	R	21	16	H	E	I	0.51805
1r0r	I	R	21	16	I	E	I	0.20406
1r0r	I	R	21	16	K	E	I	-0.09465
1r0r	I	R	21	16	L	E	I	0.22873
1r0r	I	R	21	16	M	E	I	0.44032
1r0r	I	R	21	16	N	E	I	-0.04972
1r0r	I	R	21	16	P	E	I	7.28317
1r0r	I	R	21	16	Q	E	I	0.17976
1r0r	I	R	21	16	S	E	I	-0.01611
1r0r	I	R	21	16	T	E	I	0.33964
1r0r	I	R	21	16	V	E	I	0.11336
1r0r	I	R	21	16	W	E	I	0.93167
1r0r	I	R	21	16	Y	E	I	0.81137
1r0r	I	T	17	12	A	E	I	0.965925
1r0r	I	T	17	12	C	E	I	0.80139
1r0r	I	T	17	12	D	E	I	2.84616
1r0r	I	T	17	12	E	E	I	2.97456
1r0r	I	T	17	12	F	E	I	-0.06506
1r0r	I	T	17	12	G	E	I	3.09341
1r0r	I	T	17	12	H	E	I	0.51805
1r0r	I	T	17	12	I	E	I	0.25498
1r0r	I	T	17	12	K	E	I	1.90574
1r0r	I	T	17	12	L	E	I	0.65903
1r0r	I	T	17	12	M	E	I	1.31169
1r0r	I	T	17	12	N	E	I	0.0176
1r0r	I	T	17	12	P	E	I	4.87809
1r0r	I	T	17	12	Q	E	I	2.18937
1r0r	I	T	17	12	R	E	I	3.29677
1r0r	I	T	17	12	S	E	I	0.84656
1r0r	I	T	17	12	V	E	I	0.99396
1r0r	I	T	17	12	W	E	I	2.89278
1r0r	I	T	17	12	Y	E	I	-0.86607
1r0r	I	Y	20	15	A	E	I	5.39504
1r0r	I	Y	20	15	C	E	I	3.20677
1r0r	I	Y	20	15	D	E	I	5.54126
1r0r	I	Y	20	15	E	E	I	4.55113
1r0r	I	Y	20	15	F	E	I	0.60805
1r0r	I	Y	20	15	G	E	I	6.30911
1r0r	I	Y	20	15	H	E	I	3.20974
1r0r	I	Y	20	15	I	E	I	2.82296
1r0r	I	Y	20	15	K	E	I	5.43236
1r0r	I	Y	20	15	L	E	I	2.53772
1r0r	I	Y	20	15	M	E	I	3.09341
1r0r	I	Y	20	15	N	E	I	5.53488
1r0r	I	Y	20	15	P	E	I	6.55779
1r0r	I	Y	20	15	Q	E	I	4.43777
1r0r	I	Y	20	15	R	E	I	4.4051
1r0r	I	Y	20	15	S	E	I	5.08774
1r0r	I	Y	20	15	T	E	I	5.39504
1r0r	I	Y	20	15	V	E	I	3.4591
1r0r	I	Y	20	15	W	E	I	-0.35888
1s1q	A	D	46	46	A	A	B	0.94826
1s1q	A	F	44	44	A	A	B	0.19578
1s1q	A	F	88	88	A	A	B	0.76139
1s1q	A	N	45	45	A	A	B	1.20995
1s1q	A	V	43	43	A	A	B	0.65876
1s1q	A	W	75	75	A	A	B	0.27576
1smf	I	E	16	16	A	E	I	1.01847
1smf	I	I	13	13	A	E	I	3.53104
1smf	I	S	12	12	A	E	I	1.91059
1smf	I	T	10	10	A	E	I	2.05749
1tm1	I	E	60	41	A	E	I	2.9861
1tm1	I	E	60	41	S	E	I	2.74471
1tm1	I	M	59	40	A	E	I	1.02652
1tm1	I	M	59	40	F	E	I	1.02652
1tm1	I	M	59	40	G	E	I	2.23042
1tm1	I	M	59	40	K	E	I	1.09234
1tm1	I	M	59	40	Y	E	I	0.0564
1tm1	I	R	62	43	A	E	I	1.25475
1tm1	I	R	65	46	A	E	I	3.41413
1tm1	I	R	67	48	A	E	I	3.00743
1tm1	I	R	67	48	C	E	I	3.23219
1tm1	I	T	58	39	A	E	I	2.64741
1tm1	I	T	58	39	D	E	I	2.09673
1tm1	I	T	58	39	P	E	I	3.75182
1tm1	I	V	70	51	A	E	I	0.02483
1tm1	I	Y	61	42	A	E	I	2.71121
1tm1	I	Y	61	42	G	E	I	4.67575
1uuz	A	C	64	64	A	A	D	0.65015
1uuz	A	H	62	62	A	A	D	1.77285
1uuz	A	H	62	62	D	A	D	3.37545
1uuz	A	H	62	62	N	A	D	1.51792
1uuz	A	H	62	62	Q	A	D	1.51792
1vfb	A	H	30	30	A	AB	C	0.814773
1vfb	A	S	93	93	A	AB	C	0.226445
1vfb	A	T	53	53	A	AB	C	-0.23
1vfb	A	W	92	92	A	AB	C	2.38027
1vfb	A	Y	32	32	A	AB	C	1.02956
1vfb	A	Y	32	32	F	AB	C	1.18
1vfb	A	Y	49	49	A	AB	C	0.799003
1vfb	A	Y	50	50	A	AB	C	0.42789
1vfb	A	Y	50	50	F	AB	C	0.48
1vfb	B	D	54	54	A	AB	C	0.743043
1vfb	B	D	58	58	A	AB	C	-0.20229
1vfb	B	D	100	100	A	AB	C	3.0515
1vfb	B	D	100	100	N	AB	C	3.72
1vfb	B	E	98	98	A	AB	C	1.1186
1vfb	B	N	56	56	A	AB	C	0.192533
1vfb	B	R	99	99	A	AB	C	0.156777
1vfb	B	R	102	102	K	AB	C	1.58
1vfb	B	R	102	102	M	AB	C	3.23
1vfb	B	T	30	30	A	AB	C	0.022095
1vfb	B	W	52	52	A	AB	C	0.7276
1vfb	B	Y	101	101	A	AB	C	4
1vfb	B	Y	101	101	F	AB	C	1.55936
1vfb	C	D	18	18	A	AB	C	0.3133
1vfb	C	D	119	119	A	AB	C	0.98415
1vfb	C	I	124	124	A	AB	C	1.2102
1vfb	C	K	116	116	A	AB	C	0.704323
1vfb	C	L	129	129	A	AB	C	0.190477
1vfb	C	N	19	19	A	AB	C	0.33194
1vfb	C	Q	121	121	A	AB	C	2.89169
1vfb	C	R	125	125	A	AB	C	1.81189
1vfb	C	S	24	24	A	AB	C	0.8168
1vfb	C	T	118	118	A	AB	C	0.788193
1vfb	C	V	120	120	A	AB	C	0.905447
1vfb	C	Y	23	23	A	AB	C	0.4034
1xd3	B	D	39	39	A	A	B	-0.41983
1xd3	B	D	52	52	A	A	B	-0.24559
1xd3	B	D	58	58	A	A	B	-0.24559
1xd3	B	E	24	24	A	A	B	-0.24559
1xd3	B	E	51	51	A	A	B	1.56891
1xd3	B	H	68	68	N	A	B	0
1xd3	B	I	44	44	A	A	B	0.27193
1xd3	B	K	6	6	A	A	B	1.37412
1xd3	B	K	6	6	R	A	B	0.3094
1xd3	B	K	11	11	R	A	B	1.43375
1xd3	B	K	27	27	A	A	B	-0.06382
1xd3	B	K	27	27	R	A	B	0.27193
1xd3	B	K	33	33	R	A	B	0
1xd3	B	L	8	8	A	A	B	2.73662
1xd3	B	R	42	42	L	A	B	-0.88146
1xd3	B	R	54	54	L	A	B	0.88815
1xd3	B	R	72	72	L	A	B	1.33084
1xd3	B	R	74	74	L	A	B	2.43087
1z7x	W	D	435	436	A	W	X	3.65835
1z7x	W	E	206	207	A	W	X	1.01755
1z7x	W	E	287	288	A	W	X	1.31985
1z7x	W	E	344	345	A	W	X	1.5598
1z7x	W	E	401	402	A	W	X	1.30487
1z7x	W	I	459	460	A	W	X	0.33704
1z7x	W	K	320	321	A	W	X	1.31985
1z7x	W	R	457	458	A	W	X	0.8473
1z7x	W	S	289	290	A	W	X	0.81348
1z7x	W	W	261	262	A	W	X	1.33446
1z7x	W	W	263	264	A	W	X	2.20995
1z7x	W	W	318	319	A	W	X	0.99236
1z7x	W	W	375	376	A	W	X	1.6677
1z7x	W	Y	434	435	A	W	X	5.94929
1z7x	W	Y	434	435	F	W	X	0.12049
1z7x	W	Y	437	438	A	W	X	2.62121
1z7x	W	Y	437	438	F	W	X	2.16364
2a9k	B	G	99	71	D	A	B	2.40833
2ajf	E	F	360	38	S	A	E	-0.08216
2ajf	E	K	344	22	R	A	E	-0.00735
2ajf	E	N	479	157	K	A	E	2.01036
2ajf	E	T	487	165	S	A	E	1.8219
2b42	A	H	374	374	A	A	B	1.62016
2b42	A	H	374	374	K	A	B	2.5391
2b42	A	H	374	374	Q	A	B	1.06409
2btf	P	F	59	59	A	A	P	1.59396
2btf	P	G	120	120	F	A	P	1.71901
2btf	P	K	125	125	A	A	P	0.45954
2btf	P	V	60	60	E	A	P	0.97764
2c0l	A	N	382	48	A	A	B	0.70312
2c0l	A	Q	586	252	R	A	B	1.51973
2c0l	A	S	589	255	Y	A	B	0.2798
2dqj	H	D	32	32	A	LH	Y	0.9
2dqj	H	D	32	32	E	LH	Y	0.6
2dqj	H	D	32	32	N	LH	Y	0.4
2dqj	H	D	101	101	G	LH	Y	-0.1
2dqj	H	Y	33	33	F	LH	Y	1.1
2dqj	H	Y	33	33	L	LH	Y	2.1
2dqj	H	Y	33	33	W	LH	Y	1.8
2dqj	H	Y	53	53	A	LH	Y	0.2
2dqj	H	Y	53	53	F	LH	Y	0.7
2dqj	H	Y	53	53	L	LH	Y	0.9
2dqj	H	Y	53	53	W	LH	Y	0.8
2dqj	H	Y	58	58	A	LH	Y	1.7
2dqj	H	Y	58	58	F	LH	Y	0.4
2dqj	H	Y	58	58	L	LH	Y	1.6
2dqj	L	S	91	91	A	LH	Y	0.5
2dqj	L	S	93	93	A	LH	Y	0.1
2dqj	L	Y	50	50	A	LH	Y	1.7
2dqj	L	Y	50	50	F	LH	Y	1.25
2dqj	L	Y	50	50	L	LH	Y	2.9
2dqj	L	Y	96	96	F	LH	Y	0.8
2dqj	Y	W	62	62	G	LH	Y	1
2g2u	A	D	104	79	K	A	B	-0.45238
2g2u	A	E	31	6	A	A	B	0.65015
2g2u	A	S	130	105	K	A	B	-1.4678
2g2u	B	E	73	73	A	A	B	-1.97723
2g2u	B	E	73	73	M	A	B	-3.53209
2g2u	B	F	36	36	A	A	B	2.76087
2g2u	B	F	142	142	A	A	B	0.27552
2g2u	B	G	48	48	A	A	B	-0.42612
2g2u	B	G	141	141	A	A	B	-0.41335
2g2u	B	H	41	41	A	A	B	1.71513
2g2u	B	H	148	148	A	A	B	1.1177
2g2u	B	K	74	74	A	A	B	-0.21709
2g2u	B	R	144	144	A	A	B	-0.34201
2g2u	B	R	160	160	A	A	B	0.66905
2g2u	B	S	35	35	A	A	B	-0.94984
2g2u	B	S	39	39	A	A	B	-0.95508
2g2u	B	S	71	71	A	A	B	-0.51164
2g2u	B	S	113	113	A	A	B	-0.61163
2g2u	B	W	112	112	A	A	B	0.95767
2g2u	B	W	150	150	A	A	B	1.78323
2g2u	B	W	162	162	A	A	B	0.53062
2g2u	B	Y	50	50	A	A	B	-2.07341
2g2u	B	Y	51	51	A	A	B	-0.62805
2g2u	B	Y	53	53	A	A	B	2.29918
2g2u	B	Y	143	143	A	A	B	-1.84518
2gox	B	N	138	38	A	A	B	1.45004
2gox	B	R	131	31	A	A	B	1.88108
2hle	A	K	149	141	Q	A	B	-0.4102
2hle	A	L	95	87	R	A	B	2.28475
2hrk	A	K	159	157	A	A	B	0.95245
2hrk	A	T	127	125	V	A	B	0.72027
2hrk	B	T	57	55	V	A	B	0.6235
2i26	N	A	30	30	V	N	L	0.03035
2i26	N	S	61	61	R	N	L	-0.62574
2i9b	E	H	143	145	A	A	E	0.66089
2i9b	E	K	139	141	A	A	E	0.67353
2i9b	E	R	137	139	A	A	E	-0.28732
2i9b	E	R	142	144	A	A	E	0.36283
2i9b	E	R	145	147	A	A	E	0.41987
2j0t	D	C	70	70	S	A	D	4.40484
2j0t	D	M	66	66	A	A	D	1.67934
2j0t	D	S	68	68	A	A	D	2.10402
2j0t	D	S	68	68	E	A	D	2.18305
2j0t	D	S	68	68	R	A	D	2.8332
2j0t	D	S	68	68	Y	A	D	2.97503
2j0t	D	T	2	2	A	A	D	4.38488
2j0t	D	T	2	2	L	A	D	2.67916
2j0t	D	T	2	2	R	A	D	5.0404
2j0t	D	T	2	2	S	A	D	1.59265
2j0t	D	V	4	4	A	A	D	0
2j0t	D	V	4	4	I	A	D	1.64079
2j0t	D	V	4	4	K	A	D	1.82249
2j0t	D	V	4	4	S	A	D	0.98133
2j0t	D	V	69	69	I	A	D	0.8086
2j0t	D	V	69	69	T	A	D	-0.07743
2j12	A	S	299	128	A	A	B	0.95245
2j1k	C	G	370	25	D	C	T	0.18355
2j1k	C	R	384	39	A	C	T	0.76399
2j1k	C	R	515	170	A	C	T	0.05149
2jel	H	A	82	84	S	LH	P	0
2jel	H	E	85	89	A	LH	P	0
2jel	H	E	85	89	D	LH	P	0
2jel	H	E	85	89	K	LH	P	0
2jel	H	E	85	89	Q	LH	P	0
2jel	H	Q	3	3	K	LH	P	4.08795
2jel	L	S	43	48	C	LH	P	0
2jel	L	T	7	7	N	LH	P	0.4102
2jel	L	T	7	7	S	LH	P	0
2jel	P	D	69	69	E	LH	P	0.95245
2jel	P	E	5	5	D	LH	P	0.4102
2jel	P	E	5	5	Q	LH	P	0.7125
2jel	P	E	66	66	K	LH	P	4.08795
2jel	P	E	68	68	A	LH	P	0.4102
2jel	P	E	70	70	A	LH	P	2.7253
2jel	P	E	70	70	K	LH	P	4.08795
2jel	P	E	75	75	R	LH	P	2.7253
2jel	P	E	83	83	A	LH	P	0
2jel	P	F	2	2	W	LH	P	2.6174
2jel	P	F	2	2	Y	LH	P	0
2jel	P	H	76	76	A	LH	P	-0.4102
2jel	P	H	76	76	D	LH	P	-0.65015
2jel	P	K	24	24	E	LH	P	0
2jel	P	K	27	27	E	LH	P	0
2jel	P	K	72	72	E	LH	P	0.4102
2jel	P	K	72	72	R	LH	P	0
2jel	P	K	79	79	E	LH	P	0.4102
2jel	P	N	12	12	D	LH	P	0
2jel	P	N	38	38	T	LH	P	0
2jel	P	P	11	11	E	LH	P	0
2jel	P	Q	4	4	K	LH	P	1.36265
2jel	P	Q	57	57	E	LH	P	-0.4102
2jel	P	Q	71	71	E	LH	P	2.7253
2jel	P	R	17	17	G	LH	P	0
2jel	P	R	17	17	K	LH	P	0
2jel	P	S	41	41	C	LH	P	1.4947
2jel	P	S	46	46	C	LH	P	0
2jel	P	S	64	64	T	LH	P	4.08795
2jel	P	T	34	34	Q	LH	P	0
2jel	P	T	36	36	Q	LH	P	0.4102
2jel	P	T	62	62	A	LH	P	0
2jel	P	T	62	62	N	LH	P	0
2jel	P	V	6	6	F	LH	P	0
2o3b	B	D	75	76	E	A	B	5.43181
2o3b	B	D	75	76	N	A	B	5.89668
2o3b	B	E	24	25	A	A	B	5.46881
2o3b	B	E	24	25	D	A	B	0.59866
2o3b	B	E	24	25	Q	A	B	5.39235
2o3b	B	Q	74	75	A	A	B	3.22936
2o3b	B	W	76	77	A	A	B	4.06916
2oob	A	G	941	20	S	A	B	0.2351
2oob	A	K	935	14	E	A	B	-0.1781
2pcb	A	A	193	195	F	A	B	0.73286
2pcb	A	D	34	36	N	A	B	0.8204
2pcb	A	E	32	34	Q	A	B	0.60508
2pcb	A	E	35	37	Q	A	B	0.67525
2pcb	A	E	290	292	N	A	B	0.87004
2pcb	A	E	291	293	Q	A	B	-0.05646
2pcc	A	D	34	36	A	A	B	-0.89605
2pcc	A	E	290	292	A	A	B	6.19564
2pcc	A	V	197	199	A	A	B	2.10034
2pcc	B	A	81	86	G	A	B	1.89973
2pcc	B	K	72	77	A	A	B	0.30333
2pcc	B	K	87	92	A	A	B	0.90087
2sic	I	M	73	67	A	E	I	0.21762
2sic	I	M	73	67	D	E	I	0.75069
2sic	I	M	73	67	E	E	I	0.79521
2sic	I	M	73	67	G	E	I	0.14506
2sic	I	M	73	67	H	E	I	0.21762
2sic	I	M	73	67	I	E	I	1.6026
2sic	I	M	73	67	K	E	I	0
2sic	I	M	73	67	L	E	I	-0.23995
2sic	I	M	73	67	R	E	I	0
2sic	I	M	73	67	V	E	I	0.7125
2vir	C	S	157	130	L	AB	C	3.67775
2vir	C	T	131	104	I	AB	C	4.90835
2vlj	D	Q	34	33	A	ABC	DE	0.97479
2vlj	D	S	31	30	A	ABC	DE	0.62694
2vlj	D	S	32	31	A	ABC	DE	1.03714
2vlj	E	D	32	32	A	ABC	DE	1.57145
2vlj	E	D	56	56	A	ABC	DE	0.13205
2vlj	E	I	53	53	L	ABC	DE	1.41698
2vlj	E	I	53	53	V	ABC	DE	0.20074
2vlj	E	N	55	55	A	ABC	DE	1.12836
2vlj	E	N	55	55	D	ABC	DE	0.49488
2vlj	E	Q	58	58	A	ABC	DE	0.49488
2vlj	E	Q	58	58	E	ABC	DE	0
2vlj	E	S	99	99	A	ABC	DE	-0.03517
2vlj	E	Y	101	101	A	ABC	DE	0.23231
2vlj	E	Y	101	101	F	ABC	DE	0.49488
2wpt	A	D	33	33	A	A	B	-0.13205
2wpt	A	D	33	33	L	A	B	-3.39961
2wpt	A	E	30	30	A	A	B	1.73202
2wpt	A	E	39	39	H	A	B	0.03819
2wpt	A	E	41	41	A	A	B	4.49815
2wpt	A	N	34	34	A	A	B	-0.37945
2wpt	A	N	34	34	V	A	B	-0.89605
2wpt	A	P	56	56	A	A	B	2.92442
2wpt	A	R	38	38	A	A	B	-1.10969
2wpt	A	R	38	38	T	A	B	-1.03714
2wpt	A	R	42	42	A	A	B	-0.23995
2wpt	A	R	42	42	E	A	B	-0.37201
2wpt	A	S	50	50	A	A	B	2.423
2wpt	A	V	37	37	A	A	B	3.80505
2wpt	B	F	86	86	A	A	B	1.05669
2wpt	B	K	97	97	A	A	B	0.64859
2wpt	B	N	72	72	A	A	B	0.700535
2wpt	B	N	75	75	A	A	B	1.25021
2wpt	B	Q	92	92	A	A	B	0.383545
2wpt	B	R	54	54	A	A	B	0.8712
2wpt	B	S	74	74	A	A	B	-0.133955
2wpt	B	S	77	77	A	A	B	-0.45663
2wpt	B	S	78	78	A	A	B	-0.095105
2wpt	B	S	84	84	A	A	B	-0.06717
2wpt	B	T	87	87	A	A	B	0.37614
2wpt	B	V	98	98	A	A	B	0.264685
3bk3	C	A	36	37	R	A	C	1.38119
3bk3	C	I	2	3	A	A	C	1.0375
3bk3	C	I	2	3	R	A	C	0.65015
3bk3	C	I	18	19	A	A	C	0.48585
3bk3	C	I	18	19	R	A	C	0.4235
3bk3	C	I	21	22	A	A	C	1.30625
3bk3	C	I	21	22	R	A	C	2.1192
3bk3	C	I	27	28	A	A	C	1.26011
3bk3	C	I	27	28	R	A	C	1.17419
3bk3	C	L	1	2	A	A	C	0
3bk3	C	L	1	2	R	A	C	0.02631
3bk3	C	T	3	4	P	A	C	0.48585
3bk3	C	T	5	6	P	A	C	1.74108
3bn9	B	D	217	214	A	B	CD	0.56583
3bn9	B	E	169	163	A	B	CD	0.37297
3bn9	B	F	94	89	A	B	CD	0.63882
3bn9	B	H	143	138	A	B	CD	0.08501
3bn9	B	I	41	26	A	B	CD	0
3bn9	B	I	60	45	A	B	CD	0.83466
3bn9	B	K	224	221	A	B	CD	0.78444
3bn9	B	L	153	147	A	B	CD	0.33597
3bn9	B	N	95	90	A	B	CD	0.77283
3bn9	B	Q	38	23	A	B	CD	-0.41503
3bn9	B	Q	145	140	A	B	CD	0.13302
3bn9	B	Q	174	168	A	B	CD	-0.03468
3bn9	B	Q	175	169	A	B	CD	2.50731
3bn9	B	R	87	82	A	B	CD	-0.15913
3bn9	B	R	222	219	A	B	CD	-0.09364
3bn9	B	T	98	93	A	B	CD	1.1313
3bn9	B	T	150	144	A	B	CD	0.29064
3bn9	B	Y	146	141	A	B	CD	1.08393
3bp8	A	F	136	136	A	A	C	0.7082
3bp8	C	A	63	51	F	A	C	0.61481
3hfm	H	D	32	32	A	HL	Y	1.89696
3hfm	H	D	32	32	N	HL	Y	0.17025
3hfm	H	D	101	101	A	HL	Y	1.22693
3hfm	H	D	101	101	E	HL	Y	2.13145
3hfm	H	D	101	101	F	HL	Y	2.32671
3hfm	H	D	101	101	G	HL	Y	0.358605
3hfm	H	D	101	101	K	HL	Y	2.12312
3hfm	H	D	101	101	N	HL	Y	1.49011
3hfm	H	D	101	101	Q	HL	Y	2.08378
3hfm	H	D	101	101	R	HL	Y	2.27835
3hfm	H	D	101	101	S	HL	Y	1.86815
3hfm	H	S	31	31	A	HL	Y	0.17025
3hfm	H	W	98	98	A	HL	Y	5.507
3hfm	H	W	98	98	F	HL	Y	3.2434
3hfm	H	Y	33	33	A	HL	Y	6.03105
3hfm	H	Y	33	33	F	HL	Y	1.07051
3hfm	H	Y	33	33	L	HL	Y	2.0056
3hfm	H	Y	33	33	W	HL	Y	1.7484
3hfm	H	Y	53	53	A	HL	Y	3.24821
3hfm	H	Y	53	53	F	HL	Y	0.62009
3hfm	H	Y	53	53	L	HL	Y	0.80635
3hfm	H	Y	53	53	W	HL	Y	0.70571
3hfm	H	Y	58	58	A	HL	Y	1.67492
3hfm	H	Y	58	58	F	HL	Y	0.36288
3hfm	H	Y	58	58	L	HL	Y	1.51266
3hfm	L	N	31	31	A	HL	Y	5.21065
3hfm	L	N	31	31	D	HL	Y	1.34259
3hfm	L	N	31	31	E	HL	Y	5.70356
3hfm	L	N	32	32	A	HL	Y	5.10394
3hfm	L	Q	53	53	A	HL	Y	0.95245
3hfm	L	Y	50	50	F	HL	Y	1.98111
3hfm	L	Y	50	50	L	HL	Y	3.61859
3hfm	L	Y	96	96	A	HL	Y	2.70524
3hfm	L	Y	96	96	F	HL	Y	1.40084
3hfm	Y	G	102	102	V	HL	Y	0.39502
3hfm	Y	H	15	15	A	HL	Y	-0.44502
3hfm	Y	I	98	98	A	HL	Y	0
3hfm	Y	K	96	96	A	HL	Y	6.9835
3hfm	Y	K	96	96	M	HL	Y	6.77242
3hfm	Y	K	96	96	R	HL	Y	5.34943
3hfm	Y	K	97	97	A	HL	Y	5.8575
3hfm	Y	K	97	97	D	HL	Y	6.76391
3hfm	Y	K	97	97	E	HL	Y	3.6021
3hfm	Y	K	97	97	G	HL	Y	6.42626
3hfm	Y	K	97	97	M	HL	Y	0.946335
3hfm	Y	K	97	97	R	HL	Y	3.05081
3hfm	Y	L	75	75	A	HL	Y	0.70399
3hfm	Y	N	19	19	D	HL	Y	0.4102
3hfm	Y	N	19	19	K	HL	Y	0.23995
3hfm	Y	N	19	19	Q	HL	Y	-0.04246
3hfm	Y	N	93	93	A	HL	Y	0.21108
3hfm	Y	R	21	21	A	HL	Y	0.902717
3hfm	Y	R	21	21	E	HL	Y	2.45179
3hfm	Y	R	21	21	G	HL	Y	2.41947
3hfm	Y	R	21	21	H	HL	Y	2.16787
3hfm	Y	R	21	21	K	HL	Y	1.75767
3hfm	Y	R	21	21	M	HL	Y	2.04852
3hfm	Y	R	21	21	N	HL	Y	2.32671
3hfm	Y	R	21	21	Q	HL	Y	2.39594
3hfm	Y	R	21	21	W	HL	Y	2.13145
3hfm	Y	R	73	73	A	HL	Y	-0.33118
3hfm	Y	S	100	100	A	HL	Y	0.26748
3hfm	Y	T	89	89	A	HL	Y	0
3hfm	Y	W	63	63	A	HL	Y	0.31897
3hfm	Y	Y	20	20	A	HL	Y	4.57072
3hfm	Y	Y	20	20	F	HL	Y	-0.483645
3hfm	Y	Y	20	20	L	HL	Y	2.18305
3nps	A	D	96	91	A	A	BC	1.50603
3nps	A	D	217	214	A	A	BC	1.46576
3nps	A	E	169	163	A	A	BC	0.61494
3nps	A	F	94	89	A	A	BC	1.59357
3nps	A	F	97	92	A	A	BC	0.46323
3nps	A	H	143	138	A	A	BC	1.87384
3nps	A	I	41	26	A	A	BC	0.64111
3nps	A	I	60	45	A	A	BC	-0.3316
3nps	A	K	224	221	A	A	BC	-0.10354
3nps	A	L	153	147	A	A	BC	0.29554
3nps	A	N	95	90	A	A	BC	0.25325
3nps	A	Q	38	23	A	A	BC	0.02631
3nps	A	Q	145	140	A	A	BC	0.29554
3nps	A	Q	174	168	A	A	BC	-0.05918
3nps	A	Q	175	169	A	A	BC	0.74041
3nps	A	R	87	82	A	A	BC	-0.15149
3nps	A	R	222	219	A	A	BC	-0.08385
3nps	A	T	98	93	A	A	BC	0.72333
3nps	A	T	150	144	A	A	BC	0.17485
3nps	A	Y	146	141	A	A	BC	1.77369
3sgb	I	A	15	15	C	E	I	0.04093
3sgb	I	A	15	15	D	E	I	0.46946
3sgb	I	A	15	15	E	E	I	0.66172
3sgb	I	A	15	15	F	E	I	-1.16349
3sgb	I	A	15	15	G	E	I	2.45036
3sgb	I	A	15	15	H	E	I	-0.44661
3sgb	I	A	15	15	I	E	I	-0.44661
3sgb	I	A	15	15	K	E	I	2.45524
3sgb	I	A	15	15	L	E	I	0.16633
3sgb	I	A	15	15	M	E	I	0.08767
3sgb	I	A	15	15	N	E	I	-0.08783
3sgb	I	A	15	15	P	E	I	0.54468
3sgb	I	A	15	15	Q	E	I	0.42394
3sgb	I	A	15	15	R	E	I	2.00608
3sgb	I	A	15	15	S	E	I	0.89775
3sgb	I	A	15	15	T	E	I	0.32626
3sgb	I	A	15	15	V	E	I	-0.711655
3sgb	I	A	15	15	W	E	I	-1.5311
3sgb	I	A	15	15	Y	E	I	-1.62335
3sgb	I	E	19	19	A	E	I	1.00443
3sgb	I	E	19	19	C	E	I	1.15762
3sgb	I	E	19	19	D	E	I	0.54468
3sgb	I	E	19	19	F	E	I	1.91538
3sgb	I	E	19	19	G	E	I	2.07438
3sgb	I	E	19	19	H	E	I	0.51843
3sgb	I	E	19	19	I	E	I	-0.61434
3sgb	I	E	19	19	K	E	I	0.16633
3sgb	I	E	19	19	L	E	I	0.768
3sgb	I	E	19	19	M	E	I	-0.18674
3sgb	I	E	19	19	N	E	I	1.08603
3sgb	I	E	19	19	P	E	I	2.24211
3sgb	I	E	19	19	Q	E	I	0.18087
3sgb	I	E	19	19	R	E	I	1.25653
3sgb	I	E	19	19	S	E	I	1.91538
3sgb	I	E	19	19	T	E	I	2.11236
3sgb	I	E	19	19	V	E	I	0.1257
3sgb	I	E	19	19	W	E	I	1.52523
3sgb	I	E	19	19	Y	E	I	0.768
3sgb	I	G	32	32	A	E	I	1.2747
3sgb	I	G	32	32	C	E	I	2.57373
3sgb	I	G	32	32	D	E	I	1.60139
3sgb	I	G	32	32	E	E	I	1.9441
3sgb	I	G	32	32	F	E	I	2.97842
3sgb	I	G	32	32	H	E	I	2.69842
3sgb	I	G	32	32	I	E	I	4.03308
3sgb	I	G	32	32	K	E	I	2.48834
3sgb	I	G	32	32	L	E	I	2.61954
3sgb	I	G	32	32	M	E	I	2.76505
3sgb	I	G	32	32	N	E	I	2.24211
3sgb	I	G	32	32	P	E	I	1.08093
3sgb	I	G	32	32	Q	E	I	2.91337
3sgb	I	G	32	32	R	E	I	3.45672
3sgb	I	G	32	32	S	E	I	1.58434
3sgb	I	G	32	32	T	E	I	2.99603
3sgb	I	G	32	32	V	E	I	2.78625
3sgb	I	G	32	32	W	E	I	3.85525
3sgb	I	G	32	32	Y	E	I	3.05115
3sgb	I	K	13	13	A	E	I	-2.53479
3sgb	I	K	13	13	C	E	I	-0.57636
3sgb	I	K	13	13	D	E	I	-0.61434
3sgb	I	K	13	13	E	E	I	0.03174
3sgb	I	K	13	13	F	E	I	-0.71502
3sgb	I	K	13	13	G	E	I	-0.71502
3sgb	I	K	13	13	H	E	I	-0.39563
3sgb	I	K	13	13	I	E	I	-1.32511
3sgb	I	K	13	13	L	E	I	-1.79097
3sgb	I	K	13	13	M	E	I	-1.14931
3sgb	I	K	13	13	N	E	I	-0.64997
3sgb	I	K	13	13	P	E	I	0
3sgb	I	K	13	13	Q	E	I	-0.61434
3sgb	I	K	13	13	R	E	I	-0.68264
3sgb	I	K	13	13	S	E	I	-2.55002
3sgb	I	K	13	13	T	E	I	-1.92072
3sgb	I	K	13	13	V	E	I	-0.9413
3sgb	I	K	13	13	W	E	I	-0.01319
3sgb	I	K	13	13	Y	E	I	-0.57636
3sgb	I	L	18	18	A	E	I	2.92956
3sgb	I	L	18	18	C	E	I	-0.01319
3sgb	I	L	18	18	D	E	I	5.58633
3sgb	I	L	18	18	E	E	I	6.08553
3sgb	I	L	18	18	F	E	I	1.35406
3sgb	I	L	18	18	G	E	I	4.93083
3sgb	I	L	18	18	H	E	I	1.68899
3sgb	I	L	18	18	I	E	I	4.41618
3sgb	I	L	18	18	K	E	I	3.13586
3sgb	I	L	18	18	M	E	I	0.4467
3sgb	I	L	18	18	N	E	I	3.35044
3sgb	I	L	18	18	P	E	I	8.32319
3sgb	I	L	18	18	Q	E	I	2.50805
3sgb	I	L	18	18	R	E	I	3.31806
3sgb	I	L	18	18	S	E	I	4.09785
3sgb	I	L	18	18	T	E	I	3.15818
3sgb	I	L	18	18	V	E	I	2.99603
3sgb	I	L	18	18	W	E	I	1.83812
3sgb	I	L	18	18	Y	E	I	1.65167
3sgb	I	N	28	28	S	E	I	0.0097
3sgb	I	N	36	36	A	E	I	0.32626
3sgb	I	N	36	36	C	E	I	0.34463
3sgb	I	N	36	36	D	E	I	0.89775
3sgb	I	N	36	36	E	E	I	0.94873
3sgb	I	N	36	36	F	E	I	-0.13932
3sgb	I	N	36	36	G	E	I	0.30731
3sgb	I	N	36	36	H	E	I	-0.12299
3sgb	I	N	36	36	I	E	I	0.19505
3sgb	I	N	36	36	K	E	I	0.57102
3sgb	I	N	36	36	L	E	I	0.73002
3sgb	I	N	36	36	M	E	I	0.1387
3sgb	I	N	36	36	P	E	I	0.57102
3sgb	I	N	36	36	Q	E	I	0.23998
3sgb	I	N	36	36	R	E	I	0.57102
3sgb	I	N	36	36	S	E	I	0.40306
3sgb	I	N	36	36	T	E	I	0.0097
3sgb	I	N	36	36	V	E	I	-0.23836
3sgb	I	N	36	36	W	E	I	0.51843
3sgb	I	N	36	36	Y	E	I	-0.1071
3sgb	I	P	14	14	A	E	I	-0.18674
3sgb	I	P	14	14	C	E	I	-0.32267
3sgb	I	P	14	14	D	E	I	-1.0181
3sgb	I	P	14	14	E	E	I	-0.61434
3sgb	I	P	14	14	F	E	I	-0.33993
3sgb	I	P	14	14	G	E	I	0.05297
3sgb	I	P	14	14	H	E	I	0.27359
3sgb	I	P	14	14	I	E	I	-0.02329
3sgb	I	P	14	14	K	E	I	0.1124
3sgb	I	P	14	14	L	E	I	-0.13932
3sgb	I	P	14	14	M	E	I	-0.49328
3sgb	I	P	14	14	N	E	I	-0.12299
3sgb	I	P	14	14	Q	E	I	-0.31144
3sgb	I	P	14	14	R	E	I	0.30731
3sgb	I	P	14	14	S	E	I	0.06477
3sgb	I	P	14	14	T	E	I	-0.1071
3sgb	I	P	14	14	V	E	I	-0.30591
3sgb	I	P	14	14	W	E	I	-0.49328
3sgb	I	P	14	14	Y	E	I	-0.39563
3sgb	I	R	21	21	A	E	I	0.05297
3sgb	I	R	21	21	C	E	I	0.54468
3sgb	I	R	21	21	D	E	I	0.62934
3sgb	I	R	21	21	E	E	I	0.66172
3sgb	I	R	21	21	F	E	I	0.22465
3sgb	I	R	21	21	G	E	I	1.09109
3sgb	I	R	21	21	H	E	I	0.44714
3sgb	I	R	21	21	I	E	I	0.23998
3sgb	I	R	21	21	K	E	I	-0.27376
3sgb	I	R	21	21	L	E	I	0.22465
3sgb	I	R	21	21	M	E	I	0.1257
3sgb	I	R	21	21	N	E	I	0.32626
3sgb	I	R	21	21	P	E	I	7.57288
3sgb	I	R	21	21	Q	E	I	0.04093
3sgb	I	R	21	21	S	E	I	0.27359
3sgb	I	R	21	21	T	E	I	0.44714
3sgb	I	R	21	21	V	E	I	-0.02329
3sgb	I	R	21	21	W	E	I	0.30731
3sgb	I	R	21	21	Y	E	I	0.2897
3sgb	I	T	17	17	A	E	I	3.36114
3sgb	I	T	17	17	C	E	I	2.88377
3sgb	I	T	17	17	D	E	I	4.88416
3sgb	I	T	17	17	E	E	I	4.56149
[truncated: 43 more rows]

## Sheet: Table S2
Table S2. tDB database.
Name	Chain	Res_in	Pos_ini	Pos_sequence	Res_out	Part1	Part2	ddGexp_av
1a22	A	C	182	182	A	A	B	1.00925
1a22	A	D	26	26	A	A	B	-0.20554
1a22	A	D	171	171	A	A	B	0.79502
1a22	A	E	56	56	A	A	B	0.4051
1a22	A	E	65	65	A	A	B	-0.486275
1a22	A	E	66	66	A	A	B	0.42954
1a22	A	E	174	174	A	A	B	-0.91179
1a22	A	E	186	186	A	A	B	-0.00598
1a22	A	F	10	10	A	A	B	1.03865
1a22	A	F	25	25	A	A	B	-0.438895
1a22	A	F	54	54	A	A	B	0.86876
1a22	A	F	176	176	A	A	B	0.4102
1a22	A	F	191	191	A	A	B	0.19108
1a22	A	G	187	187	A	A	B	0.3398
1a22	A	H	18	18	A	A	B	-0.492925
1a22	A	H	21	21	A	A	B	0.17763
1a22	A	I	4	4	A	A	B	0.40835
1a22	A	I	58	58	A	A	B	1.63663
1a22	A	I	179	179	A	A	B	0.802705
1a22	A	K	70	70	A	A	B	0.52034
1a22	A	K	168	168	A	A	B	-0.177335
1a22	A	K	172	172	A	A	B	2.0064
1a22	A	L	6	6	A	A	B	0.59905
1a22	A	L	9	9	A	A	B	-0.04004
1a22	A	L	15	15	A	A	B	0.14961
1a22	A	L	45	45	A	A	B	1.21157
1a22	A	L	73	73	A	A	B	-0.19986
1a22	A	M	14	14	A	A	B	0.05
1a22	A	N	12	12	A	A	B	0.09985
1a22	A	N	63	63	A	A	B	0.30701
1a22	A	P	5	5	A	A	B	0.42954
1a22	A	P	48	48	A	A	B	0.4102
1a22	A	P	59	59	A	A	B	0.37994
1a22	A	P	61	61	A	A	B	1.20798
1a22	A	Q	22	22	A	A	B	-0.209795
1a22	A	Q	29	29	A	A	B	-0.594195
1a22	A	Q	46	46	A	A	B	0.10395
1a22	A	Q	68	68	A	A	B	0.5939
1a22	A	Q	69	69	A	A	B	-0.04999
1a22	A	Q	181	181	A	A	B	0.2701
1a22	A	R	8	8	A	A	B	0.19991
1a22	A	R	16	16	A	A	B	0.2381
1a22	A	R	19	19	A	A	B	0.05119
1a22	A	R	64	64	A	A	B	1.72039
1a22	A	R	167	167	A	A	B	0.28907
1a22	A	R	178	178	A	A	B	2.4115
1a22	A	R	183	183	A	A	B	0.521125
1a22	A	S	7	7	A	A	B	0.3398
1a22	A	S	51	51	A	A	B	0.323925
1a22	A	S	55	55	A	A	B	0.11015
1a22	A	S	57	57	A	A	B	0.19991
1a22	A	S	62	62	A	A	B	0.12763
1a22	A	S	71	71	A	A	B	0.40835
1a22	A	S	184	184	A	A	B	-0.04999
1a22	A	S	188	188	A	A	B	-0.19986
1a22	A	T	3	3	A	A	B	-0.04999
1a22	A	T	175	175	A	A	B	1.95245
1a22	A	V	180	180	A	A	B	0
1a22	A	V	185	185	A	A	B	0.86876
1a22	A	Y	42	42	A	A	B	0.19956
1a22	A	Y	164	164	A	A	B	0.323925
1a22	B	C	308	108	A	A	B	0
1a22	B	C	322	122	A	A	B	0
1a22	B	D	326	126	A	A	B	0.990815
1a22	B	D	364	164	A	A	B	1.52384
1a22	B	D	405	205	A	A	B	-0.04614
1a22	B	E	242	42	A	A	B	0.52983
1a22	B	E	244	44	A	A	B	1.45727
1a22	B	E	279	79	A	A	B	-0.07902
1a22	B	E	282	82	A	A	B	0.7822
1a22	B	E	291	91	A	A	B	0.1776
1a22	B	E	320	120	A	A	B	-0.19061
1a22	B	E	327	127	A	A	B	0.83723
1a22	B	E	373	173	A	A	B	0.08271
1a22	B	E	375	175	A	A	B	-0.07902
1a22	B	E	380	180	A	A	B	0.19912
1a22	B	E	407	207	A	A	B	-0.07902
1a22	B	E	409	209	A	A	B	-0.06235
1a22	B	E	424	224	A	A	B	0.1079
1a22	B	F	296	96	S	A	B	-0.041005
1a22	B	F	300	100	A	A	B	-0.01498
1a22	B	I	303	103	A	A	B	1.36154
1a22	B	I	305	105	A	A	B	1.50248
1a22	B	I	328	128	A	A	B	0.5878
1a22	B	I	365	165	A	A	B	2.1521
1a22	B	K	281	81	A	A	B	0.14377
1a22	B	K	310	110	A	A	B	0.0428
1a22	B	K	321	121	A	A	B	0.0870133
1a22	B	K	367	167	A	A	B	-0.0125567
1a22	B	K	379	179	A	A	B	0
1a22	B	K	403	203	A	A	B	0.23995
1a22	B	K	406	206	A	A	B	0.19912
1a22	B	K	415	215	A	A	B	0.691277
1a22	B	N	272	72	A	A	B	0.078285
1a22	B	N	297	97	A	A	B	-0.25493
1a22	B	N	418	218	A	A	B	0.298587
1a22	B	P	241	41	A	A	B	0.25936
1a22	B	P	306	106	A	A	B	2.96296
1a22	B	Q	274	74	A	A	B	-0.145113
1a22	B	Q	278	78	A	A	B	-0.4102
1a22	B	Q	330	130	A	A	B	-0.03035
1a22	B	Q	366	166	A	A	B	0.0123833
1a22	B	Q	416	216	A	A	B	0.89307
1a22	B	R	239	39	A	A	B	0.26882
1a22	B	R	243	43	A	A	B	1.67749
1a22	B	R	243	43	L	A	B	0.52099
1a22	B	R	243	43	M	A	B	0.99928
1a22	B	R	270	70	A	A	B	0.598993
1a22	B	R	271	71	A	A	B	0.55797
1a22	B	R	411	211	A	A	B	0.0564
1a22	B	R	417	217	A	A	B	-0.19031
1a22	B	S	247	47	A	A	B	-0.01498
1a22	B	S	298	98	A	A	B	-0.13309
1a22	B	S	299	99	A	A	B	-0.50638
1a22	B	S	302	102	A	A	B	-0.0288075
1a22	B	S	324	124	A	A	B	0.25123
1a22	B	S	419	219	A	A	B	0.031915
1a22	B	T	251	51	A	A	B	0.0697
1a22	B	T	273	73	A	A	B	-0.0299775
1a22	B	T	277	77	A	A	B	0.0497133
1a22	B	T	301	101	A	A	B	1.53472
1a22	B	T	394	194	A	A	B	0.201327
1a22	B	T	395	195	A	A	B	-0.0947767
1a22	B	V	325	125	A	A	B	1.14091
1a22	B	V	329	129	A	A	B	-0.04614
1a22	B	V	371	171	A	A	B	-0.65823
1a22	B	W	276	76	A	A	B	0.545632
1a22	B	W	280	80	A	A	B	0.0322175
1a22	B	W	304	104	A	A	B	4.5
1a22	B	W	304	104	F	A	B	2.7817
1a22	B	W	369	169	A	A	B	4.5
1a22	B	Y	295	95	A	A	B	0.19912
1a4y	A	D	435	435	A	A	B	3.49389
1a4y	A	E	287	287	A	A	B	0.10018
1a4y	A	E	344	344	A	A	B	0.192803
1a4y	A	E	401	401	A	A	B	0.89425
1a4y	A	I	459	459	A	A	B	0.692893
1a4y	A	K	320	320	A	A	B	-0.303217
1a4y	A	R	33	33	A	A	B	0.3
1a4y	A	R	457	457	A	A	B	-0.207913
1a4y	A	S	289	289	A	A	B	0.0140967
1a4y	A	W	261	261	A	A	B	0.10018
1a4y	A	W	263	263	A	A	B	1.19002
1a4y	A	W	318	318	A	A	B	1.49969
1a4y	A	W	375	375	A	A	B	1.0114
1a4y	A	Y	434	434	A	A	B	3.28613
1a4y	A	Y	434	434	F	A	B	0.57862
1a4y	A	Y	437	437	A	A	B	0.811793
1a4y	A	Y	437	437	F	A	B	0.222495
1a4y	B	E	108	108	A	A	B	-0.307453
1a4y	B	H	8	8	A	A	B	0.901037
1a4y	B	H	13	13	A	A	B	-0.298783
1a4y	B	H	84	84	A	A	B	0.190083
1a4y	B	H	114	114	A	A	B	0.65305
1a4y	B	K	40	40	G	A	B	3.23319
1a4y	B	K	40	40	Q	A	B	4.24769
1a4y	B	N	68	68	A	A	B	0.17256
1a4y	B	Q	12	12	A	A	B	0.299977
1a4y	B	R	31	31	A	A	B	0.2
1a4y	B	R	32	32	A	A	B	0.90308
1a4y	B	R	66	66	A	A	B	0.200893
1a4y	B	R	70	70	A	A	B	-0.210557
1a4y	B	W	89	89	A	A	B	0.213317
1acb	I	L	45	45	D	E	I	6.76702
1acb	I	L	45	45	E	E	I	6.5499
1acb	I	L	45	45	G	E	I	6.02922
1acb	I	L	45	45	I	E	I	4.22785
1acb	I	L	45	45	P	E	I	6.84815
1acb	I	L	45	45	S	E	I	4.94793
1ahw	A	T	197	197	A	AB	C	1.32249
1ahw	C	D	178	178	A	AB	C	-0.492135
1ahw	C	L	176	176	A	AB	C	0.99314
1ahw	C	N	199	199	A	AB	C	1.0775
1ahw	C	T	167	167	A	AB	C	-0.037035
1ahw	C	T	170	170	A	AB	C	1.05252
1ahw	C	V	198	198	A	AB	C	-0.30701
1ahw	C	Y	156	156	A	AB	C	4
1ahw	C	Y	157	157	A	AB	C	-1.88775
1ak4	C	A	488	88	G	A	D	4.01454
1ak4	C	A	488	88	V	A	D	2.13155
1ak4	C	A	492	92	G	A	D	1.9431
1ak4	C	A	492	92	V	A	D	1.72136
1ak4	C	G	489	89	A	A	D	3.4378
1ak4	C	G	489	89	V	A	D	4.39025
1ak4	C	H	487	87	A	A	D	2.37151
1ak4	C	H	487	87	Q	A	D	2.33451
1ak4	C	H	487	87	R	A	D	3.00652
1ak4	C	I	491	91	A	A	D	1.6026
1ak4	C	I	491	91	V	A	D	1.36265
1ak4	C	P	485	85	A	A	D	2.44716
1ak4	C	P	490	90	A	A	D	3.53324
1ak4	C	P	493	93	A	A	D	2.0448
1ak4	C	V	486	86	A	A	D	2.3533
1brs	A	D	54	54	A	A	D	-0.61835
1brs	A	D	101	101	A	A	D	1.5
1brs	A	E	60	60	A	A	D	-0.00374
1brs	A	E	73	73	A	A	D	2.4627
1brs	A	E	73	73	C	A	D	2.52594
1brs	A	E	73	73	F	A	D	2.23269
1brs	A	E	73	73	Q	A	D	1.45048
1brs	A	E	73	73	S	A	D	3.00713
1brs	A	E	73	73	W	A	D	1.65541
1brs	A	E	73	73	Y	A	D	2.41104
1brs	A	H	102	102	A	A	D	6.27216
1brs	A	H	102	102	D	A	D	4.54552
1brs	A	H	102	102	G	A	D	6.81325
1brs	A	H	102	102	L	A	D	7.65781
1brs	A	H	102	102	Q	A	D	4.54552
1brs	A	K	27	27	A	A	D	5.19026
1brs	A	N	58	58	A	A	D	3.09174
1brs	A	R	59	59	A	A	D	5.02655
1brs	A	R	59	59	K	A	D	2.48535
1brs	A	R	83	83	Q	A	D	5.41398
1brs	A	R	87	87	A	A	D	5.668
1brs	A	W	35	35	F	A	D	1.25886
1brs	D	D	35	35	A	A	D	4.35442
1brs	D	D	39	39	A	A	D	6.81426
1brs	D	E	76	76	A	A	D	1.16176
1brs	D	E	80	80	A	A	D	0.48415
1brs	D	T	42	42	A	A	D	1.82778
1brs	D	W	38	38	F	A	D	1.64079
1brs	D	W	44	44	F	A	D	0.0564
1brs	D	Y	29	29	A	A	D	3.43334
1brs	D	Y	29	29	F	A	D	-0.13205
1c08	A	N	31	31	A	AB	C	5.25
1c08	A	N	32	32	A	AB	C	5.2
1c08	A	Q	53	53	A	AB	C	1
1c08	A	Y	96	96	A	AB	C	2.8
1c08	B	D	32	32	A	AB	C	2
1c08	B	D	101	101	A	AB	C	1.5
1c08	B	S	31	31	A	AB	C	0.2
1c08	B	W	98	98	A	AB	C	5.5
1c08	B	Y	33	33	A	AB	C	6
1c08	B	Y	53	53	A	AB	C	3.29
1c08	B	Y	58	58	A	AB	C	1.7
1c08	C	H	15	15	A	AB	C	-0.5
1c08	C	I	98	98	A	AB	C	-0.1
1c08	C	K	96	96	A	AB	C	7
1c08	C	K	97	97	A	AB	C	6
1c08	C	L	75	75	A	AB	C	1.25
1c08	C	N	93	93	A	AB	C	0.6
1c08	C	R	21	21	A	AB	C	1
1c08	C	R	73	73	A	AB	C	-0.2
1c08	C	S	100	100	A	AB	C	0.25
1c08	C	T	89	89	A	AB	C	0
1c08	C	W	63	63	A	AB	C	0.3
1c08	C	Y	20	20	A	AB	C	5
1cho	I	A	15	15	C	EFG	I	-0.32203
1cho	I	A	15	15	D	EFG	I	0
1cho	I	A	15	15	E	EFG	I	0.22174
1cho	I	A	15	15	F	EFG	I	-0.7248
1cho	I	A	15	15	G	EFG	I	0.06506
1cho	I	A	15	15	H	EFG	I	-0.32203
1cho	I	A	15	15	I	EFG	I	0.64585
1cho	I	A	15	15	K	EFG	I	2.46244
1cho	I	A	15	15	L	EFG	I	0.13866
1cho	I	A	15	15	M	EFG	I	0.13866
1cho	I	A	15	15	N	EFG	I	-0.28471
1cho	I	A	15	15	P	EFG	I	3.06381
1cho	I	A	15	15	Q	EFG	I	0.43603
1cho	I	A	15	15	R	EFG	I	0.46175
1cho	I	A	15	15	S	EFG	I	0.06506
1cho	I	A	15	15	T	EFG	I	0.955
1cho	I	A	15	15	V	EFG	I	0.92487
1cho	I	A	15	15	W	EFG	I	-1.89737
1cho	I	A	15	15	Y	EFG	I	-0.86282
1cho	I	E	19	19	A	EFG	I	2.29936
1cho	I	E	19	19	C	EFG	I	2.68872
1cho	I	E	19	19	D	EFG	I	0.86895
1cho	I	E	19	19	F	EFG	I	3.57007
1cho	I	E	19	19	G	EFG	I	3.57007
1cho	I	E	19	19	H	EFG	I	2.05938
1cho	I	E	19	19	I	EFG	I	2.60406
1cho	I	E	19	19	K	EFG	I	3.54244
1cho	I	E	19	19	L	EFG	I	2.82738
1cho	I	E	19	19	M	EFG	I	2.65912
1cho	I	E	19	19	N	EFG	I	2.29936
1cho	I	E	19	19	P	EFG	I	2.55314
1cho	I	E	19	19	Q	EFG	I	1.31476
1cho	I	E	19	19	R	EFG	I	3.62839
1cho	I	E	19	19	S	EFG	I	2.75378
1cho	I	E	19	19	T	EFG	I	2.86713
1cho	I	E	19	19	V	EFG	I	2.40401
1cho	I	E	19	19	W	EFG	I	3.11413
1cho	I	E	19	19	Y	EFG	I	2.6304
1cho	I	G	32	32	A	EFG	I	-0.918195
1cho	I	G	32	32	C	EFG	I	2.50652
1cho	I	G	32	32	D	EFG	I	3.06381
1cho	I	G	32	32	E	EFG	I	2.57781
1cho	I	G	32	32	F	EFG	I	0.10068
1cho	I	G	32	32	H	EFG	I	-0.96926
1cho	I	G	32	32	I	EFG	I	2.33298
1cho	I	G	32	32	K	EFG	I	1.5661
1cho	I	G	32	32	L	EFG	I	1.72526
1cho	I	G	32	32	M	EFG	I	1.61277
1cho	I	G	32	32	N	EFG	I	0.93967
1cho	I	G	32	32	P	EFG	I	0.31939
1cho	I	G	32	32	Q	EFG	I	2.34908
1cho	I	G	32	32	R	EFG	I	1.71946
1cho	I	G	32	32	S	EFG	I	-0.13558
1cho	I	G	32	32	T	EFG	I	2.04619
1cho	I	G	32	32	V	EFG	I	0.637825
1cho	I	G	32	32	W	EFG	I	1.04129
1cho	I	G	32	32	Y	EFG	I	-0.96926
1cho	I	K	13	13	A	EFG	I	0.17841
1cho	I	K	13	13	C	EFG	I	0.49596
1cho	I	K	13	13	D	EFG	I	-0.50364
1cho	I	K	13	13	E	EFG	I	0.17841
1cho	I	K	13	13	F	EFG	I	1.07745
1cho	I	K	13	13	G	EFG	I	1.79596
1cho	I	K	13	13	H	EFG	I	0.13866
1cho	I	K	13	13	I	EFG	I	1.52277
1cho	I	K	13	13	L	EFG	I	0.3751
1cho	I	K	13	13	M	EFG	I	0.42003
1cho	I	K	13	13	N	EFG	I	-0.35574
1cho	I	K	13	13	P	EFG	I	2.04619
1cho	I	K	13	13	Q	EFG	I	-0.56457
1cho	I	K	13	13	R	EFG	I	-0.37231
1cho	I	K	13	13	S	EFG	I	-0.42044
1cho	I	K	13	13	T	EFG	I	0.3751
1cho	I	K	13	13	V	EFG	I	1.18448
1cho	I	K	13	13	W	EFG	I	1.00472
1cho	I	K	13	13	Y	EFG	I	1.05965
1cho	I	L	18	18	A	EFG	I	4.77875
1cho	I	L	18	18	C	EFG	I	2.60406
1cho	I	L	18	18	D	EFG	I	7.09689
1cho	I	L	18	18	E	EFG	I	6.65805
1cho	I	L	18	18	F	EFG	I	-1.47994
1cho	I	L	18	18	G	EFG	I	5.997
1cho	I	L	18	18	H	EFG	I	2.95713
1cho	I	L	18	18	I	EFG	I	4.41398
1cho	I	L	18	18	K	EFG	I	4.30983
1cho	I	L	18	18	M	EFG	I	0.347245
1cho	I	L	18	18	N	EFG	I	3.30828
1cho	I	L	18	18	P	EFG	I	8.67408
1cho	I	L	18	18	Q	EFG	I	3.20787
1cho	I	L	18	18	R	EFG	I	3.94842
1cho	I	L	18	18	S	EFG	I	4.91443
1cho	I	L	18	18	T	EFG	I	4.41974
1cho	I	L	18	18	V	EFG	I	4.21149
1cho	I	L	18	18	W	EFG	I	-1.66639
1cho	I	L	18	18	Y	EFG	I	-2.19276
1cho	I	N	28	28	S	EFG	I	0
1cho	I	N	36	36	A	EFG	I	-1.34436
1cho	I	N	36	36	C	EFG	I	-0.1109
1cho	I	N	36	36	D	EFG	I	-1.02497
1cho	I	N	36	36	E	EFG	I	2.29936
1cho	I	N	36	36	F	EFG	I	2.33298
1cho	I	N	36	36	G	EFG	I	-1.37396
1cho	I	N	36	36	H	EFG	I	-0.7248
1cho	I	N	36	36	I	EFG	I	-0.0296
1cho	I	N	36	36	K	EFG	I	2.29936
1cho	I	N	36	36	L	EFG	I	0.60792
1cho	I	N	36	36	M	EFG	I	-0.2054
1cho	I	N	36	36	P	EFG	I	-1.80737
1cho	I	N	36	36	Q	EFG	I	-0.18219
1cho	I	N	36	36	R	EFG	I	1.5661
1cho	I	N	36	36	S	EFG	I	-1.45526
1cho	I	N	36	36	T	EFG	I	-1.2793
1cho	I	N	36	36	V	EFG	I	0.03238
1cho	I	N	36	36	W	EFG	I	2.14705
1cho	I	N	36	36	Y	EFG	I	2.52884
1cho	I	P	14	14	A	EFG	I	0.3751
1cho	I	P	14	14	C	EFG	I	-0.96926
1cho	I	P	14	14	D	EFG	I	-0.83898
1cho	I	P	14	14	E	EFG	I	-0.70964
1cho	I	P	14	14	F	EFG	I	-0.30307
1cho	I	P	14	14	G	EFG	I	0.62719
1cho	I	P	14	14	H	EFG	I	-0.1109
1cho	I	P	14	14	I	EFG	I	-0.50364
1cho	I	P	14	14	K	EFG	I	0.3809
1cho	I	P	14	14	L	EFG	I	-0.51694
1cho	I	P	14	14	M	EFG	I	-0.81608
1cho	I	P	14	14	N	EFG	I	-0.76866
1cho	I	P	14	14	Q	EFG	I	-0.71717
1cho	I	P	14	14	R	EFG	I	0.39235
1cho	I	P	14	14	S	EFG	I	-0.43429
1cho	I	P	14	14	T	EFG	I	-0.54167
1cho	I	P	14	14	V	EFG	I	-0.54167
1cho	I	P	14	14	W	EFG	I	-0.2054
1cho	I	P	14	14	Y	EFG	I	-0.38936
1cho	I	R	21	21	A	EFG	I	3.14541
1cho	I	R	21	21	C	EFG	I	3.48007
1cho	I	R	21	21	D	EFG	I	3.72814
1cho	I	R	21	21	E	EFG	I	3.45671
1cho	I	R	21	21	F	EFG	I	2.91046
1cho	I	R	21	21	G	EFG	I	3.43548
1cho	I	R	21	21	H	EFG	I	2.75378
1cho	I	R	21	21	I	EFG	I	2.07863
1cho	I	R	21	21	K	EFG	I	0.65314
1cho	I	R	21	21	L	EFG	I	2.7894
1cho	I	R	21	21	M	EFG	I	2.57781
1cho	I	R	21	21	N	EFG	I	3.48007
1cho	I	R	21	21	P	EFG	I	7.18355
1cho	I	R	21	21	Q	EFG	I	2.44248
1cho	I	R	21	21	S	EFG	I	3.14032
1cho	I	R	21	21	T	EFG	I	2.6304
1cho	I	R	21	21	V	EFG	I	2.03609
1cho	I	R	21	21	W	EFG	I	2.40401
1cho	I	R	21	21	Y	EFG	I	2.95713
1cho	I	T	17	17	A	EFG	I	4.17647
1cho	I	T	17	17	C	EFG	I	3.28075
1cho	I	T	17	17	D	EFG	I	6.7218
1cho	I	T	17	17	E	EFG	I	5.57844
1cho	I	T	17	17	F	EFG	I	4.17174
1cho	I	T	17	17	G	EFG	I	5.21756
1cho	I	T	17	17	H	EFG	I	3.59879
1cho	I	T	17	17	I	EFG	I	3.59879
1cho	I	T	17	17	K	EFG	I	4.03308
1cho	I	T	17	17	L	EFG	I	4.35247
1cho	I	T	17	17	M	EFG	I	3.8975
1cho	I	T	17	17	N	EFG	I	4.25482
1cho	I	T	17	17	P	EFG	I	4.17174
1cho	I	T	17	17	Q	EFG	I	3.62839
1cho	I	T	17	17	R	EFG	I	3.82768
1cho	I	T	17	17	S	EFG	I	2.31641
1cho	I	T	17	17	V	EFG	I	3.37767
1cho	I	T	17	17	W	EFG	I	4.09813
1cho	I	T	17	17	Y	EFG	I	4.40817
1cho	I	Y	20	20	A	EFG	I	2.50652
1cho	I	Y	20	20	C	EFG	I	2.50652
1cho	I	Y	20	20	D	EFG	I	6.11407
1cho	I	Y	20	20	E	EFG	I	4.94315
1cho	I	Y	20	20	F	EFG	I	0.17841
1cho	I	Y	20	20	G	EFG	I	3.12998
1cho	I	Y	20	20	H	EFG	I	1.48776
1cho	I	Y	20	20	I	EFG	I	2.07863
1cho	I	Y	20	20	K	EFG	I	3.11946
1cho	I	Y	20	20	L	EFG	I	0.67451
1cho	I	Y	20	20	M	EFG	I	1.20878
1cho	I	Y	20	20	N	EFG	I	2.95713
1cho	I	Y	20	20	P	EFG	I	8.44125
1cho	I	Y	20	20	Q	EFG	I	3.10875
1cho	I	Y	20	20	R	EFG	I	2.86713
1cho	I	Y	20	20	S	EFG	I	2.82738
1cho	I	Y	20	20	T	EFG	I	3.25608
1cho	I	Y	20	20	V	EFG	I	3.41344
1cho	I	Y	20	20	W	EFG	I	0.38666
1dqj	A	N	31	31	A	AB	C	2.01209
1dqj	A	N	32	32	A	AB	C	4.08795
1dqj	A	S	91	91	A	AB	C	1.43093
1dqj	A	Y	96	96	A	AB	C	1.13429
1dqj	B	D	32	32	A	AB	C	2.01209
1dqj	B	D	101	101	A	AB	C	1.37563
1dqj	B	W	98	98	A	AB	C	4.92823
1dqj	B	Y	33	33	A	AB	C	5.52078
1dqj	B	Y	53	53	A	AB	C	1.17949
1dqj	C	K	96	96	A	AB	C	6.15171
1dqj	C	K	97	97	A	AB	C	3.51736
1dqj	C	L	75	75	A	AB	C	1.45144
1dqj	C	N	93	93	A	AB	C	0.64944
1dqj	C	R	21	21	A	AB	C	1.21296
1dqj	C	S	100	100	A	AB	C	0.77507
1dqj	C	T	89	89	A	AB	C	0.84028
1dqj	C	W	62	62	A	AB	C	0.75757
1dqj	C	W	63	63	A	AB	C	1.34537
1dqj	C	Y	20	20	A	AB	C	3.28351
1eaw	A	D	96	91	A	A	B	0.65371
1eaw	A	D	217	214	A	A	B	2.22665
1eaw	A	E	169	163	A	A	B	0.7029
1eaw	A	F	94	89	A	A	B	0.72778
1eaw	A	F	97	92	A	A	B	0.89103
1eaw	A	H	143	138	A	A	B	-0.01446
1eaw	A	I	41	26	A	A	B	-0.82159
1eaw	A	I	60	45	A	A	B	-0.19414
1eaw	A	K	224	221	A	A	B	0.47552
1eaw	A	L	153	147	A	A	B	0.50159
1eaw	A	N	95	90	A	A	B	0.30775
1eaw	A	Q	38	23	A	A	B	-0.51833
1eaw	A	Q	145	140	A	A	B	0.30634
1eaw	A	Q	174	168	A	A	B	0.56446
1eaw	A	Q	175	169	A	A	B	-0.13295
1eaw	A	R	87	82	A	A	B	-0.14958
1eaw	A	R	222	219	A	A	B	-0.08845
1eaw	A	T	98	93	A	A	B	0.25446
1eaw	A	T	150	144	A	A	B	0.08935
1eaw	A	Y	146	141	A	A	B	0.50159
1efn	A	I	96	12	A	A	B	1.44941
1efn	A	T	97	13	H	A	B	1.24216
1f47	A	D	4	4	A	A	B	0.69074
1f47	A	D	7	7	A	A	B	1.73173
1f47	A	D	7	7	G	A	B	1.13807
1f47	A	D	7	7	S	A	B	2.06256
1f47	A	F	11	11	A	A	B	2.44276
1f47	A	I	8	8	A	A	B	2.51344
1f47	A	K	14	14	A	A	B	-0.04259
1f47	A	L	6	6	A	A	B	0.9244
1f47	A	L	12	12	A	A	B	2.29277
1f47	A	Q	15	15	A	A	B	-0.04554
1f47	A	Y	5	5	A	A	B	0.8684
1f47	B	D	2	2	A	A	B	0.7
1fcc	C	D	40	40	A	A	C	0.285975
1fcc	C	E	27	27	A	A	C	4.9
1fcc	C	E	42	42	A	A	C	0.392505
1fcc	C	K	28	28	A	A	C	1.27738
1fcc	C	K	31	31	A	A	C	3.48684
1fcc	C	N	35	35	A	A	C	2.38124
1fcc	C	T	25	25	A	A	C	0.239975
1fcc	C	W	43	43	A	A	C	3.76898
1gc1	C	D	10	10	A	G	C	0
1gc1	C	D	53	53	A	G	C	0.30115
1gc1	C	D	56	56	A	G	C	-0.06985
1gc1	C	D	63	63	A	G	C	-0.319485
1gc1	C	D	88	88	A	G	C	-0.06985
1gc1	C	E	77	77	A	G	C	0.56083
1gc1	C	E	85	85	A	G	C	1.31591
1gc1	C	E	87	87	A	G	C	0.21881
1gc1	C	E	92	92	A	G	C	0.018105
1gc1	C	H	27	27	A	G	C	0.28112
1gc1	C	K	1	1	A	G	C	0.061175
1gc1	C	K	2	2	A	G	C	-0.018335
1gc1	C	K	7	7	A	G	C	0.99678
1gc1	C	K	8	8	A	G	C	0.102575
1gc1	C	K	21	21	A	G	C	-0.12898
1gc1	C	K	22	22	A	G	C	0.239975
1gc1	C	K	29	29	A	G	C	0.56282
1gc1	C	K	35	35	A	G	C	0.320855
1gc1	C	K	46	46	A	G	C	1.42942
1gc1	C	K	50	50	A	G	C	0.048685
1gc1	C	K	72	72	A	G	C	-0.018335
1gc1	C	K	75	75	A	G	C	0.158895
1gc1	C	K	90	90	A	G	C	0.048685
1gc1	C	L	44	44	A	G	C	1.04742
1gc1	C	L	51	51	A	G	C	1.23265
1gc1	C	N	30	30	A	G	C	0.170125
1gc1	C	N	32	32	A	G	C	0.181225
1gc1	C	N	39	39	A	G	C	0.462555
1gc1	C	N	52	52	A	G	C	0.703775
1gc1	C	N	66	66	A	G	C	-0.031915
1gc1	C	N	73	73	A	G	C	-0.10895
1gc1	C	Q	20	20	A	G	C	-0.018335
1gc1	C	Q	25	25	A	G	C	0.031
1gc1	C	Q	33	33	A	G	C	0.102575
1gc1	C	Q	40	40	A	G	C	-0.4101
1gc1	C	Q	64	64	A	G	C	0.4411
1gc1	C	Q	89	89	A	G	C	0.170125
1gc1	C	Q	89	89	L	G	C	-0.31058
1gc1	C	Q	94	94	A	G	C	-0.1079
1gc1	C	R	58	58	A	G	C	0.131025
1gc1	C	R	59	59	A	G	C	1.1673
1gc1	C	S	19	19	A	G	C	0
1gc1	C	S	23	23	A	G	C	0.29118
1gc1	C	S	31	31	A	G	C	0.102575
1gc1	C	S	42	42	A	G	C	0
1gc1	C	S	49	49	A	G	C	0.605245
1gc1	C	S	60	60	A	G	C	-0.089245
1gc1	C	T	11	11	A	G	C	0
1gc1	C	T	15	15	A	G	C	0.320855
1gc1	C	T	17	17	A	G	C	-0.12796
1gc1	C	T	45	45	A	G	C	-0.149365
1gc1	C	T	81	81	A	G	C	1.5
1gc1	C	V	86	86	A	G	C	-0.06985
1gc1	C	Y	82	82	A	G	C	1.28924
1gc1	G	E	91	13	A	G	C	-0.12898
1gcq	C	A	632	42	G	AB	C	1.35199
1gcq	C	G	611	21	V	AB	C	-0.02519
1gcq	C	P	595	5	A	AB	C	0.76698
1gcq	C	P	608	18	A	AB	C	0.12067
1gcq	C	P	609	19	A	AB	C	0.08516
1gcq	C	P	657	67	A	AB	C	1.31499
1gcq	C	W	637	47	Y	AB	C	2.14485
1iar	A	E	9	9	Q	A	B	3.11645
1iar	A	E	19	19	A	A	B	-0.3198
1iar	A	E	19	19	R	A	B	-0.11673
1iar	A	F	82	82	A	A	B	-0.083185
1iar	A	F	82	82	D	A	B	-0.57996
1iar	A	I	5	5	A	A	B	1.18003
1iar	A	I	5	5	R	A	B	0.79521
1iar	A	I	11	11	A	A	B	0.069445
1iar	A	K	12	12	E	A	B	0.13932
1iar	A	K	12	12	S	A	B	-0.0274
1iar	A	K	77	77	A	A	B	0.15679
1iar	A	K	77	77	E	A	B	0.61114
1iar	A	K	84	84	A	A	B	0.347295
1iar	A	K	84	84	D	A	B	1.878
1iar	A	N	15	15	A	A	B	-0.036915
1iar	A	N	15	15	D	A	B	-0.07798
1iar	A	N	89	89	A	A	B	1.56853
1iar	A	Q	8	8	A	A	B	-0.011165
1iar	A	Q	8	8	R	A	B	0.03888
1iar	A	Q	78	78	A	A	B	0.12735
1iar	A	Q	78	78	E	A	B	0.2448
1iar	A	R	53	53	Q	A	B	0.837415
1iar	A	R	81	81	A	A	B	0.479545
1iar	A	R	81	81	E	A	B	1.4601
1iar	A	R	85	85	A	A	B	0.428205
1iar	A	R	85	85	E	A	B	1.22324
1iar	A	R	88	88	A	A	B	3.75053
1iar	A	R	88	88	Q	A	B	2.82793
1iar	A	S	16	16	A	A	B	-0.176275
1iar	A	S	16	16	D	A	B	-0.10353
1iar	A	T	6	6	A	A	B	-0.091765
1iar	A	T	6	6	D	A	B	1.39118
1iar	A	T	13	13	A	A	B	0.978745
1iar	A	T	13	13	D	A	B	-0.21843
1iar	A	W	91	91	A	A	B	0.72936
1iar	A	W	91	91	D	A	B	1.30515
1iar	B	D	66	66	A	A	B	0.73
1iar	B	D	67	67	A	A	B	2.36
1iar	B	D	72	72	A	A	B	4.35
1iar	B	D	125	125	A	A	B	0.8
1iar	B	F	41	41	A	A	B	2.26
1iar	B	K	91	91	A	A	B	0.53
1iar	B	L	39	39	A	A	B	2.77
1iar	B	L	42	42	A	A	B	0
1iar	B	L	43	43	A	A	B	0.33
1iar	B	L	128	128	A	A	B	1.11
1iar	B	M	14	14	A	A	B	0.17
1iar	B	N	73	73	A	A	B	0.28
1iar	B	N	126	126	A	A	B	0.68
1iar	B	P	92	92	A	A	B	1.44
1iar	B	S	15	15	A	A	B	0.04
1iar	B	S	70	70	A	A	B	-0.24
1iar	B	S	93	93	A	A	B	-0.18
1iar	B	V	68	68	A	A	B	0.84
1iar	B	V	69	69	A	A	B	2.1
1iar	B	Y	13	13	A	A	B	5.22
1iar	B	Y	13	13	F	A	B	1.91
1iar	B	Y	74	74	A	A	B	2.73
1iar	B	Y	127	127	A	A	B	2.17
1iar	B	Y	127	127	F	A	B	-0.18
1iar	B	Y	129	129	A	A	B	0.28
1iar	B	Y	183	183	A	A	B	3.68
1iar	B	Y	183	183	F	A	B	3.16
1jck	A	P	176	172	A	A	B	1.9
1jck	A	T	20	18	A	A	B	1.5265
1jck	A	Y	90	87	A	A	B	2.54662
1jck	B	F	176	176	A	A	B	2.13155
1jck	B	K	103	103	A	A	B	0.53794
1jck	B	N	23	23	A	A	B	2.5
1jck	B	N	60	60	A	A	B	1.47039
1jck	B	V	91	91	A	A	B	2.16521
1jck	B	Y	26	26	A	A	B	1.73643
1jrh	H	D	54	56	A	LH	I	1.89242
1jrh	H	D	55	57	A	LH	I	1.68247
1jrh	H	D	56	58	A	LH	I	1.82671
1jrh	H	R	95	100	A	LH	I	0.541125
1jrh	H	W	52	54	A	LH	I	2.69224
1jrh	H	W	53	55	A	LH	I	2.40985
1jrh	H	Y	32	32	A	LH	I	1.41617
1jrh	H	Y	58	60	A	LH	I	1.22737
1jrh	H	Y	99	104	A	LH	I	1.08018
1jrh	I	E	45	45	Q	LH	I	0.0995
1jrh	I	K	47	47	A	LH	I	3.67426
1jrh	I	K	47	47	M	LH	I	3.29013
1jrh	I	K	52	52	A	LH	I	3.25571
1jrh	I	K	52	52	M	LH	I	4.90835
1jrh	I	K	98	98	A	LH	I	0.311885
1jrh	I	N	48	48	A	LH	I	0.0135633
1jrh	I	N	48	48	Q	LH	I	0.534115
1jrh	I	N	53	53	A	LH	I	4.16464
1jrh	I	N	79	79	A	LH	I	-0.266267
1jrh	I	R	84	84	A	LH	I	0.16157
1jrh	I	S	54	54	A	LH	I	0.35164
1jrh	I	T	14	14	V	LH	I	-0.02555
1jrh	I	V	51	51	A	LH	I	1.75202
1jrh	I	W	56	56	F	LH	I	-0.252445
1jrh	I	W	56	56	Y	LH	I	0.29833
1jrh	I	W	82	82	A	LH	I	4.45073
1jrh	I	W	82	82	F	LH	I	1.10197
1jrh	I	W	82	82	Y	LH	I	1.18704
1jrh	I	Y	49	49	A	LH	I	3.48318
1jrh	I	Y	49	49	F	LH	I	0.908175
1jrh	L	D	28	28	A	LH	I	0.43718
1jrh	L	E	27	27	A	LH	I	0.541125
1jrh	L	E	55	55	A	LH	I	-0.510273
1jrh	L	E	55	55	P	LH	I	-3.78565
1jrh	L	F	98	97	A	LH	I	0
1jrh	L	G	50	50	A	LH	I	4.44727
1jrh	L	S	93	93	A	LH	I	-0.650075
1jrh	L	T	94	94	A	LH	I	0.382505
1jrh	L	W	92	92	A	LH	I	2.80827
1jrh	L	W	96	95	A	LH	I	1.68247
1jrh	L	Y	30	30	A	LH	I	1.10386
1jrh	L	Y	91	91	A	LH	I	0.580225
1kac	A	P	417	15	S	A	B	-0.7925
1kac	A	S	489	87	Y	A	B	-1.25136
1ktz	A	R	25	25	A	A	B	1.47993
1ktz	A	R	25	25	K	A	B	1.15041
1ktz	A	R	94	94	A	A	B	2.88119
1ktz	A	R	94	94	K	A	B	2.19904
1ktz	A	V	92	92	I	A	B	0.24265
1ktz	B	D	32	18	A	A	B	1.966
1ktz	B	D	32	18	N	A	B	2.44419
1ktz	B	D	118	104	A	A	B	1.25991
1ktz	B	E	55	41	A	A	B	1.66124
1ktz	B	E	75	61	A	A	B	1.52499
1ktz	B	E	119	105	A	A	B	1.93869
1ktz	B	E	119	105	Q	A	B	2.07144
1ktz	B	F	30	16	A	A	B	3.42282
1ktz	B	F	110	96	A	A	B	1.37726
1ktz	B	H	79	65	A	A	B	0.74137
1ktz	B	I	50	36	A	A	B	2.34044
1ktz	B	I	53	39	A	A	B	1.81479
1ktz	B	I	125	111	A	A	B	0.98484
1ktz	B	L	27	13	A	A	B	2.26896
1ktz	B	M	112	98	A	A	B	1.31651
1ktz	B	N	47	33	A	A	B	0.73071
1ktz	B	S	49	35	A	A	B	0.77226
1ktz	B	S	52	38	A	A	B	0.66235
1ktz	B	S	52	38	L	A	B	4.47936
1ktz	B	T	51	37	A	A	B	1.95794
1ktz	B	V	62	48	A	A	B	1.09332
1ktz	B	V	77	63	A	A	B	0.86061
1mah	A	D	74	74	N	A	F	1.87832
1mah	A	F	295	295	L	A	F	1.24419
1mah	A	F	297	297	I	A	F	2.05911
1mah	A	F	297	297	Y	A	F	0.79151
1mah	A	F	338	338	G	A	F	0.79151
1mah	A	W	286	286	R	A	F	8.80345
1mah	A	Y	72	72	N	A	F	5.21423
1mah	A	Y	124	124	Q	A	F	3.00227
1mah	A	Y	337	337	A	A	F	0.38626
1n8o	E	M	84	84	K	ABC	E	1.45809
1n8o	E	M	84	84	L	ABC	E	-0.06235
1n8o	E	M	84	84	R	ABC	E	1.34767
1ppf	E	R	21	6	A	E	I	0.20503
1ppf	E	R	21	6	C	E	I	-0.08
1ppf	E	R	21	6	D	E	I	0.20503
1ppf	E	R	21	6	E	E	I	0.45416
1ppf	E	R	21	6	F	E	I	-0.967
1ppf	E	R	21	6	G	E	I	0.56953
1ppf	E	R	21	6	H	E	I	-0.48551
1ppf	E	R	21	6	I	E	I	-0.7995
1ppf	E	R	21	6	K	E	I	0.59578
1ppf	E	R	21	6	L	E	I	-0.84612
1ppf	E	R	21	6	M	E	I	-0.74858
1ppf	E	R	21	6	N	E	I	0.32469
1ppf	E	R	21	6	P	E	I	6.60819
1ppf	E	R	21	6	Q	E	I	-0.01808
1ppf	E	R	21	6	S	E	I	0.41353
1ppf	E	R	21	6	T	E	I	-0.01808
1ppf	E	R	21	6	V	E	I	-0.34453
1ppf	E	R	21	6	W	E	I	-0.52527
1ppf	E	R	21	6	Y	E	I	0.21743
1ppf	I	A	15	15	C	E	I	-0.66392
1ppf	I	A	15	15	D	E	I	1.1217
1ppf	I	A	15	15	E	E	I	0.10407
1ppf	I	A	15	15	F	E	I	-0.07189
1ppf	I	A	15	15	G	E	I	1.1217
1ppf	I	A	15	15	H	E	I	0.54486
1ppf	I	A	15	15	I	E	I	0.32469
1ppf	I	A	15	15	K	E	I	1.11118
1ppf	I	A	15	15	L	E	I	0.01753
1ppf	I	A	15	15	M	E	I	-0.39551
1ppf	I	A	15	15	N	E	I	0.90218
1ppf	I	A	15	15	P	E	I	1.96648
1ppf	I	A	15	15	Q	E	I	0.24615
1ppf	I	A	15	15	R	E	I	-0.26034
1ppf	I	A	15	15	S	E	I	0.74549
1ppf	I	A	15	15	T	E	I	0.94885
1ppf	I	A	15	15	V	E	I	0.197415
1ppf	I	A	15	15	W	E	I	-0.63154
1ppf	I	A	15	15	Y	E	I	-0.18238
1ppf	I	E	19	19	A	E	I	1.18581
1ppf	I	E	19	19	C	E	I	1.38226
1ppf	I	E	19	19	D	E	I	0.56953
1ppf	I	E	19	19	F	E	I	1.34436
1ppf	I	E	19	19	G	E	I	2.08985
1ppf	I	E	19	19	H	E	I	0.68044
1ppf	I	E	19	19	I	E	I	0.71282
1ppf	I	E	19	19	K	E	I	2.08985
1ppf	I	E	19	19	L	E	I	1.05553
1ppf	I	E	19	19	M	E	I	1.13203
1ppf	I	E	19	19	N	E	I	1.19508
1ppf	I	E	19	19	P	E	I	3.16376
1ppf	I	E	19	19	Q	E	I	0.65084
1ppf	I	E	19	19	R	E	I	1.44843
1ppf	I	E	19	19	S	E	I	1.8194
1ppf	I	E	19	19	T	E	I	1.48312
1ppf	I	E	19	19	V	E	I	1.14219
1ppf	I	E	19	19	W	E	I	1.50786
1ppf	I	E	19	19	Y	E	I	1.23075
1ppf	I	G	32	32	A	E	I	0.25385
1ppf	I	G	32	32	C	E	I	1.16198
1ppf	I	G	32	32	D	E	I	2.46082
1ppf	I	G	32	32	E	E	I	1.43639
1ppf	I	G	32	32	F	E	I	1.46022
1ppf	I	G	32	32	H	E	I	1.48312
1ppf	I	G	32	32	I	E	I	4.30882
1ppf	I	G	32	32	K	E	I	3.25825
1ppf	I	G	32	32	L	E	I	3.08444
1ppf	I	G	32	32	M	E	I	2.16345
1ppf	I	G	32	32	N	E	I	1.59051
1ppf	I	G	32	32	P	E	I	0.25999
1ppf	I	G	32	32	Q	E	I	2.75907
1ppf	I	G	32	32	R	E	I	4.77857
1ppf	I	G	32	32	S	E	I	0.90218
1ppf	I	G	32	32	T	E	I	2.77156
1ppf	I	G	32	32	V	E	I	2.51117
1ppf	I	G	32	32	W	E	I	1.6201
1ppf	I	G	32	32	Y	E	I	1.18581
1ppf	I	K	13	13	A	E	I	0.74549
1ppf	I	K	13	13	C	E	I	0.94885
1ppf	I	K	13	13	D	E	I	0.62212
1ppf	I	K	13	13	E	E	I	1.11646
1ppf	I	K	13	13	F	E	I	0.94885
1ppf	I	K	13	13	G	E	I	1.23075
1ppf	I	K	13	13	H	E	I	0.99983
1ppf	I	K	13	13	I	E	I	0.62212
1ppf	I	K	13	13	L	E	I	0.39572
1ppf	I	K	13	13	M	E	I	0.20503
1ppf	I	K	13	13	N	E	I	0.65084
1ppf	I	K	13	13	P	E	I	1.2478
1ppf	I	K	13	13	Q	E	I	0.24615
1ppf	I	K	13	13	R	E	I	-0.63154
1ppf	I	K	13	13	S	E	I	0.45416
1ppf	I	K	13	13	T	E	I	0.1635
1ppf	I	K	13	13	V	E	I	0.85885
1ppf	I	K	13	13	W	E	I	0.81909
1ppf	I	K	13	13	Y	E	I	0.49824
1ppf	I	L	18	18	A	E	I	1.00219
1ppf	I	L	18	18	C	E	I	-0.08822
1ppf	I	L	18	18	D	E	I	7.50292
1ppf	I	L	18	18	E	E	I	6.96086
1ppf	I	L	18	18	F	E	I	5.09442
1ppf	I	L	18	18	G	E	I	3.2845
1ppf	I	L	18	18	H	E	I	6.37727
1ppf	I	L	18	18	I	E	I	-0.72224
1ppf	I	L	18	18	K	E	I	5.61021
1ppf	I	L	18	18	M	E	I	1.22402
1ppf	I	L	18	18	N	E	I	5.14954
1ppf	I	L	18	18	P	E	I	6.05788
1ppf	I	L	18	18	Q	E	I	3.2989
1ppf	I	L	18	18	R	E	I	7.0802
1ppf	I	L	18	18	S	E	I	3.04712
1ppf	I	L	18	18	T	E	I	0.90218
1ppf	I	L	18	18	V	E	I	-0.48551
1ppf	I	L	18	18	W	E	I	7.43462
1ppf	I	L	18	18	Y	E	I	6.53942
1ppf	I	N	36	36	A	E	I	-1.62163
1ppf	I	N	36	36	C	E	I	0.59578
1ppf	I	N	36	36	D	E	I	-3.03325
1ppf	I	N	36	36	E	E	I	-1.00356
1ppf	I	N	36	36	F	E	I	1.8194
1ppf	I	N	36	36	G	E	I	-0.56324
1ppf	I	N	36	36	H	E	I	-0.52527
1ppf	I	N	36	36	I	E	I	0.85885
1ppf	I	N	36	36	K	E	I	2.58369
1ppf	I	N	36	36	L	E	I	2.60872
1ppf	I	N	36	36	M	E	I	1.07843
1ppf	I	N	36	36	P	E	I	-2.91662
1ppf	I	N	36	36	Q	E	I	0.37736
1ppf	I	N	36	36	R	E	I	1.8426
1ppf	I	N	36	36	S	E	I	-1.32683
1ppf	I	N	36	36	T	E	I	0.54486
1ppf	I	N	36	36	V	E	I	0.3408
1ppf	I	N	36	36	W	E	I	1.70276
1ppf	I	N	36	36	Y	E	I	1.65249
1ppf	I	P	14	14	A	E	I	-0.12233
1ppf	I	P	14	14	C	E	I	-1.9759
1ppf	I	P	14	14	D	E	I	-0.48551
1ppf	I	P	14	14	E	E	I	-1.40825
1ppf	I	P	14	14	F	E	I	-1.82987
1ppf	I	P	14	14	G	E	I	0.09203
1ppf	I	P	14	14	H	E	I	-1.73987
1ppf	I	P	14	14	I	E	I	-1.62738
1ppf	I	P	14	14	K	E	I	-0.44218
1ppf	I	P	14	14	L	E	I	-2.88091
1ppf	I	P	14	14	M	E	I	-1.55159
1ppf	I	P	14	14	N	E	I	-0.63154
1ppf	I	P	14	14	Q	E	I	-0.7995
1ppf	I	P	14	14	R	E	I	-0.13565
1ppf	I	P	14	14	S	E	I	-0.56324
1ppf	I	P	14	14	T	E	I	-0.26034
1ppf	I	P	14	14	V	E	I	-1.50291
1ppf	I	P	14	14	W	E	I	-1.9759
1ppf	I	P	14	14	Y	E	I	-0.94864
1ppf	I	T	17	17	A	E	I	3.14321
1ppf	I	T	17	17	C	E	I	2.05718
1ppf	I	T	17	17	D	E	I	4.85217
1ppf	I	T	17	17	E	E	I	3.01319
1ppf	I	T	17	17	F	E	I	1.68516
1ppf	I	T	17	17	G	E	I	3.54757
1ppf	I	T	17	17	H	E	I	1.66905
1ppf	I	T	17	17	I	E	I	1.47179
1ppf	I	T	17	17	K	E	I	3.33956
1ppf	I	T	17	17	L	E	I	2.24654
1ppf	I	T	17	17	M	E	I	2.46606
1ppf	I	T	17	17	N	E	I	2.65952
1ppf	I	T	17	17	P	E	I	3.02952
1ppf	I	T	17	17	Q	E	I	1.94014
1ppf	I	T	17	17	R	E	I	3.40154
1ppf	I	T	17	17	S	E	I	1.50864
1ppf	I	T	17	17	V	E	I	1.49069
1ppf	I	T	17	17	W	E	I	2.16345
1ppf	I	T	17	17	Y	E	I	2.44483
1ppf	I	Y	20	20	A	E	I	3.16376
1ppf	I	Y	20	20	C	E	I	3.40154
1ppf	I	Y	20	20	D	E	I	6.32629
1ppf	I	Y	20	20	E	E	I	6.32629
1ppf	I	Y	20	20	F	E	I	0.47504
1ppf	I	Y	20	20	G	E	I	4.12511
1ppf	I	Y	20	20	H	E	I	2.38067
1ppf	I	Y	20	20	I	E	I	3.87453
1ppf	I	Y	20	20	K	E	I	4.4288
1ppf	I	Y	20	20	L	E	I	1.35494
1ppf	I	Y	20	20	M	E	I	2.77156
1ppf	I	Y	20	20	N	E	I	3.5909
1ppf	I	Y	20	20	P	E	I	5.28922
1ppf	I	Y	20	20	Q	E	I	4.62886
1ppf	I	Y	20	20	R	E	I	4.30882
1ppf	I	Y	20	20	S	E	I	3.5909
1ppf	I	Y	20	20	T	E	I	4.98193
1ppf	I	Y	20	20	V	E	I	4.12511
1ppf	I	Y	20	20	W	E	I	0.23196
1rew	C	Q	86	92	A	AB	C	2.6556
1uuz	A	C	64	64	A	A	D	0.65015
1uuz	A	H	62	62	A	A	D	1.77285
1uuz	A	H	62	62	D	A	D	3.37545
1uuz	A	H	62	62	N	A	D	1.51792
1uuz	A	H	62	62	Q	A	D	1.51792
1vfb	A	H	30	30	A	AB	C	0.814773
1vfb	A	S	93	93	A	AB	C	0.226445
1vfb	A	T	53	53	A	AB	C	-0.23
1vfb	A	W	92	92	A	AB	C	2.38027
1vfb	A	Y	32	32	A	AB	C	1.02956
1vfb	A	Y	32	32	F	AB	C	1.18
1vfb	A	Y	49	49	A	AB	C	0.799003
1vfb	A	Y	50	50	A	AB	C	0.42789
1vfb	A	Y	50	50	F	AB	C	0.48
1vfb	B	D	54	54	A	AB	C	0.743043
1vfb	B	D	58	58	A	AB	C	-0.20229
1vfb	B	D	100	100	A	AB	C	3.0515
1vfb	B	D	100	100	N	AB	C	3.72
1vfb	B	E	98	98	A	AB	C	1.1186
1vfb	B	N	56	56	A	AB	C	0.192533
1vfb	B	R	99	99	A	AB	C	0.156777
1vfb	B	R	102	102	K	AB	C	1.58
1vfb	B	R	102	102	M	AB	C	3.23
1vfb	B	T	30	30	A	AB	C	0.022095
1vfb	B	W	52	52	A	AB	C	0.7276
1vfb	B	Y	101	101	A	AB	C	4
1vfb	B	Y	101	101	F	AB	C	1.55936
1vfb	C	D	18	18	A	AB	C	0.3133
1vfb	C	D	119	119	A	AB	C	0.98415
1vfb	C	I	124	124	A	AB	C	1.2102
1vfb	C	K	116	116	A	AB	C	0.704323
1vfb	C	L	129	129	A	AB	C	0.190477
1vfb	C	N	19	19	A	AB	C	0.33194
1vfb	C	Q	121	121	A	AB	C	2.89169
1vfb	C	R	125	125	A	AB	C	1.81189
1vfb	C	S	24	24	A	AB	C	0.8168
1vfb	C	T	118	118	A	AB	C	0.788193
1vfb	C	V	120	120	A	AB	C	0.905447
1vfb	C	Y	23	23	A	AB	C	0.4034
1z7x	W	D	435	436	A	W	X	3.65835
1z7x	W	E	206	207	A	W	X	1.01755
1z7x	W	E	287	288	A	W	X	1.31985
1z7x	W	E	344	345	A	W	X	1.5598
1z7x	W	E	401	402	A	W	X	1.30487
1z7x	W	I	459	460	A	W	X	0.33704
1z7x	W	K	320	321	A	W	X	1.31985
1z7x	W	R	457	458	A	W	X	0.8473
1z7x	W	S	289	290	A	W	X	0.81348
1z7x	W	W	261	262	A	W	X	1.33446
1z7x	W	W	263	264	A	W	X	2.20995
1z7x	W	W	318	319	A	W	X	0.99236
1z7x	W	W	375	376	A	W	X	1.6677
1z7x	W	Y	434	435	A	W	X	5.94929
1z7x	W	Y	434	435	F	W	X	0.12049
1z7x	W	Y	437	438	A	W	X	2.62121
1z7x	W	Y	437	438	F	W	X	2.16364
2b42	A	H	374	374	A	A	B	1.62016
2b42	A	H	374	374	K	A	B	2.5391
2b42	A	H	374	374	Q	A	B	1.06409
2c0l	A	N	382	48	A	A	B	0.70312
2c0l	A	Q	586	252	R	A	B	1.51973
2c0l	A	S	589	255	Y	A	B	0.2798
2dqj	H	D	32	32	A	LH	Y	0.9
2dqj	H	D	32	32	E	LH	Y	0.6
2dqj	H	D	32	32	N	LH	Y	0.4
2dqj	H	D	101	101	G	LH	Y	-0.1
2dqj	H	Y	33	33	F	LH	Y	1.1
2dqj	H	Y	33	33	L	LH	Y	2.1
2dqj	H	Y	33	33	W	LH	Y	1.8
2dqj	H	Y	53	53	A	LH	Y	0.2
2dqj	H	Y	53	53	F	LH	Y	0.7
2dqj	H	Y	53	53	L	LH	Y	0.9
2dqj	H	Y	53	53	W	LH	Y	0.8
2dqj	H	Y	58	58	A	LH	Y	1.7
2dqj	H	Y	58	58	F	LH	Y	0.4
2dqj	H	Y	58	58	L	LH	Y	1.6
2dqj	L	S	91	91	A	LH	Y	0.5
2dqj	L	S	93	93	A	LH	Y	0.1
2dqj	L	Y	50	50	A	LH	Y	1.7
2dqj	L	Y	50	50	F	LH	Y	1.25
2dqj	L	Y	50	50	L	LH	Y	2.9
2dqj	L	Y	96	96	F	LH	Y	0.8
2dqj	Y	W	62	62	G	LH	Y	1
2g2u	A	D	104	79	K	A	B	-0.45238
2g2u	A	E	31	6	A	A	B	0.65015
2g2u	A	S	130	105	K	A	B	-1.4678
2g2u	B	E	73	73	A	A	B	-1.97723
2g2u	B	E	73	73	M	A	B	-3.53209
2g2u	B	F	36	36	A	A	B	2.76087
2g2u	B	F	142	142	A	A	B	0.27552
2g2u	B	G	48	48	A	A	B	-0.42612
2g2u	B	G	141	141	A	A	B	-0.41335
2g2u	B	H	41	41	A	A	B	1.71513
2g2u	B	H	148	148	A	A	B	1.1177
2g2u	B	K	74	74	A	A	B	-0.21709
2g2u	B	R	144	144	A	A	B	-0.34201
2g2u	B	R	160	160	A	A	B	0.66905
2g2u	B	S	35	35	A	A	B	-0.94984
2g2u	B	S	39	39	A	A	B	-0.95508
2g2u	B	S	71	71	A	A	B	-0.51164
2g2u	B	S	113	113	A	A	B	-0.61163
2g2u	B	W	112	112	A	A	B	0.95767
2g2u	B	W	150	150	A	A	B	1.78323
2g2u	B	W	162	162	A	A	B	0.53062
2g2u	B	Y	50	50	A	A	B	-2.07341
2g2u	B	Y	51	51	A	A	B	-0.62805
2g2u	B	Y	53	53	A	A	B	2.29918
2g2u	B	Y	143	143	A	A	B	-1.84518
2gox	B	N	138	38	A	A	B	1.45004
2gox	B	R	131	31	A	A	B	1.88108
2hle	A	K	149	141	Q	A	B	-0.4102
2hle	A	L	95	87	R	A	B	2.28475
2hrk	A	K	159	157	A	A	B	0.95245
2hrk	A	T	127	125	V	A	B	0.72027
2hrk	B	T	57	55	V	A	B	0.6235
2i26	N	A	30	30	V	N	L	0.03035
2i26	N	S	61	61	R	N	L	-0.62574
2i9b	E	H	143	145	A	A	E	0.66089
2i9b	E	K	139	141	A	A	E	0.67353
2i9b	E	R	137	139	A	A	E	-0.28732
2i9b	E	R	142	144	A	A	E	0.36283
2i9b	E	R	145	147	A	A	E	0.41987
2j1k	C	G	370	25	D	C	T	0.18355
2j1k	C	R	384	39	A	C	T	0.76399
2j1k	C	R	515	170	A	C	T	0.05149
2oob	A	G	941	20	S	A	B	0.2351
2oob	A	K	935	14	E	A	B	-0.1781
2vlj	D	Q	34	33	A	ABC	DE	0.97479
2vlj	D	S	31	30	A	ABC	DE	0.62694
2vlj	D	S	32	31	A	ABC	DE	1.03714
2vlj	E	D	32	32	A	ABC	DE	1.57145
2vlj	E	D	56	56	A	ABC	DE	0.13205
2vlj	E	I	53	53	L	ABC	DE	1.41698
2vlj	E	I	53	53	V	ABC	DE	0.20074
2vlj	E	N	55	55	A	ABC	DE	1.12836
2vlj	E	N	55	55	D	ABC	DE	0.49488
2vlj	E	Q	58	58	A	ABC	DE	0.49488
2vlj	E	Q	58	58	E	ABC	DE	0
2vlj	E	S	99	99	A	ABC	DE	-0.03517
2vlj	E	Y	101	101	A	ABC	DE	0.23231
2vlj	E	Y	101	101	F	ABC	DE	0.49488
3bk3	C	A	36	37	R	A	C	1.38119
3bk3	C	I	2	3	A	A	C	1.0375
3bk3	C	I	2	3	R	A	C	0.65015
3bk3	C	I	18	19	A	A	C	0.48585
3bk3	C	I	18	19	R	A	C	0.4235
3bk3	C	I	21	22	A	A	C	1.30625
3bk3	C	I	21	22	R	A	C	2.1192
3bk3	C	I	27	28	A	A	C	1.26011
3bk3	C	I	27	28	R	A	C	1.17419
3bk3	C	L	1	2	A	A	C	0
3bk3	C	L	1	2	R	A	C	0.02631
3bk3	C	T	3	4	P	A	C	0.48585
3bk3	C	T	5	6	P	A	C	1.74108
3hfm	H	D	32	32	A	HL	Y	1.89696
3hfm	H	D	32	32	N	HL	Y	0.17025
3hfm	H	D	101	101	A	HL	Y	1.22693
3hfm	H	D	101	101	E	HL	Y	2.13145
3hfm	H	D	101	101	F	HL	Y	2.32671
3hfm	H	D	101	101	G	HL	Y	0.358605
3hfm	H	D	101	101	K	HL	Y	2.12312
3hfm	H	D	101	101	N	HL	Y	1.49011
3hfm	H	D	101	101	Q	HL	Y	2.08378
3hfm	H	D	101	101	R	HL	Y	2.27835
3hfm	H	D	101	101	S	HL	Y	1.86815
3hfm	H	S	31	31	A	HL	Y	0.17025
3hfm	H	W	98	98	A	HL	Y	5.507
3hfm	H	W	98	98	F	HL	Y	3.2434
3hfm	H	Y	33	33	A	HL	Y	6.03105
3hfm	H	Y	33	33	F	HL	Y	1.07051
3hfm	H	Y	33	33	L	HL	Y	2.0056
3hfm	H	Y	33	33	W	HL	Y	1.7484
3hfm	H	Y	53	53	A	HL	Y	3.24821
3hfm	H	Y	53	53	F	HL	Y	0.62009
3hfm	H	Y	53	53	L	HL	Y	0.80635
3hfm	H	Y	53	53	W	HL	Y	0.70571
3hfm	H	Y	58	58	A	HL	Y	1.67492
3hfm	H	Y	58	58	F	HL	Y	0.36288
3hfm	H	Y	58	58	L	HL	Y	1.51266
3hfm	L	N	31	31	A	HL	Y	5.21065
3hfm	L	N	31	31	D	HL	Y	1.34259
3hfm	L	N	31	31	E	HL	Y	5.70356
3hfm	L	N	32	32	A	HL	Y	5.10394
3hfm	L	Q	53	53	A	HL	Y	0.95245
3hfm	L	Y	50	50	F	HL	Y	1.98111
3hfm	L	Y	50	50	L	HL	Y	3.61859
3hfm	L	Y	96	96	A	HL	Y	2.70524
3hfm	L	Y	96	96	F	HL	Y	1.40084
3hfm	Y	G	102	102	V	HL	Y	0.39502
3hfm	Y	H	15	15	A	HL	Y	-0.44502
3hfm	Y	I	98	98	A	HL	Y	0
3hfm	Y	K	96	96	A	HL	Y	6.9835
3hfm	Y	K	96	96	M	HL	Y	6.77242
3hfm	Y	K	96	96	R	HL	Y	5.34943
3hfm	Y	K	97	97	A	HL	Y	5.8575
3hfm	Y	K	97	97	D	HL	Y	6.76391
3hfm	Y	K	97	97	E	HL	Y	3.6021
3hfm	Y	K	97	97	G	HL	Y	6.42626
3hfm	Y	K	97	97	M	HL	Y	0.946335
3hfm	Y	K	97	97	R	HL	Y	3.05081
3hfm	Y	L	75	75	A	HL	Y	0.70399
3hfm	Y	N	19	19	D	HL	Y	0.4102
3hfm	Y	N	19	19	K	HL	Y	0.23995
3hfm	Y	N	19	19	Q	HL	Y	-0.04246
3hfm	Y	N	93	93	A	HL	Y	0.21108
3hfm	Y	R	21	21	A	HL	Y	0.902717
3hfm	Y	R	21	21	E	HL	Y	2.45179
3hfm	Y	R	21	21	G	HL	Y	2.41947
3hfm	Y	R	21	21	H	HL	Y	2.16787
3hfm	Y	R	21	21	K	HL	Y	1.75767
3hfm	Y	R	21	21	M	HL	Y	2.04852
3hfm	Y	R	21	21	N	HL	Y	2.32671
3hfm	Y	R	21	21	Q	HL	Y	2.39594
3hfm	Y	R	21	21	W	HL	Y	2.13145
3hfm	Y	R	73	73	A	HL	Y	-0.33118
3hfm	Y	S	100	100	A	HL	Y	0.26748
3hfm	Y	T	89	89	A	HL	Y	0
3hfm	Y	W	63	63	A	HL	Y	0.31897
3hfm	Y	Y	20	20	A	HL	Y	4.57072
3hfm	Y	Y	20	20	F	HL	Y	-0.483645
3hfm	Y	Y	20	20	L	HL	Y	2.18305
3sgb	I	A	15	15	C	E	I	0.04093
3sgb	I	A	15	15	D	E	I	0.46946
3sgb	I	A	15	15	E	E	I	0.66172
3sgb	I	A	15	15	F	E	I	-1.16349
3sgb	I	A	15	15	G	E	I	2.45036
3sgb	I	A	15	15	H	E	I	-0.44661
3sgb	I	A	15	15	I	E	I	-0.44661
3sgb	I	A	15	15	K	E	I	2.45524
3sgb	I	A	15	15	L	E	I	0.16633
3sgb	I	A	15	15	M	E	I	0.08767
3sgb	I	A	15	15	N	E	I	-0.08783
3sgb	I	A	15	15	P	E	I	0.54468
3sgb	I	A	15	15	Q	E	I	0.42394
3sgb	I	A	15	15	R	E	I	2.00608
3sgb	I	A	15	15	S	E	I	0.89775
3sgb	I	A	15	15	T	E	I	0.32626
3sgb	I	A	15	15	V	E	I	-0.711655
3sgb	I	A	15	15	W	E	I	-1.5311
3sgb	I	A	15	15	Y	E	I	-1.62335
3sgb	I	E	19	19	A	E	I	1.00443
3sgb	I	E	19	19	C	E	I	1.15762
3sgb	I	E	19	19	D	E	I	0.54468
3sgb	I	E	19	19	F	E	I	1.91538
3sgb	I	E	19	19	G	E	I	2.07438
3sgb	I	E	19	19	H	E	I	0.51843
3sgb	I	E	19	19	I	E	I	-0.61434
3sgb	I	E	19	19	K	E	I	0.16633
3sgb	I	E	19	19	L	E	I	0.768
3sgb	I	E	19	19	M	E	I	-0.18674
3sgb	I	E	19	19	N	E	I	1.08603
3sgb	I	E	19	19	P	E	I	2.24211
3sgb	I	E	19	19	Q	E	I	0.18087
3sgb	I	E	19	19	R	E	I	1.25653
3sgb	I	E	19	19	S	E	I	1.91538
3sgb	I	E	19	19	T	E	I	2.11236
3sgb	I	E	19	19	V	E	I	0.1257
3sgb	I	E	19	19	W	E	I	1.52523
3sgb	I	E	19	19	Y	E	I	0.768
3sgb	I	G	32	32	A	E	I	1.2747
3sgb	I	G	32	32	C	E	I	2.57373
3sgb	I	G	32	32	D	E	I	1.60139
3sgb	I	G	32	32	E	E	I	1.9441
3sgb	I	G	32	32	F	E	I	2.97842
3sgb	I	G	32	32	H	E	I	2.69842
3sgb	I	G	32	32	I	E	I	4.03308
3sgb	I	G	32	32	K	E	I	2.48834
3sgb	I	G	32	32	L	E	I	2.61954
3sgb	I	G	32	32	M	E	I	2.76505
3sgb	I	G	32	32	N	E	I	2.24211
3sgb	I	G	32	32	P	E	I	1.08093
3sgb	I	G	32	32	Q	E	I	2.91337
3sgb	I	G	32	32	R	E	I	3.45672
3sgb	I	G	32	32	S	E	I	1.58434
3sgb	I	G	32	32	T	E	I	2.99603
3sgb	I	G	32	32	V	E	I	2.78625
3sgb	I	G	32	32	W	E	I	3.85525
3sgb	I	G	32	32	Y	E	I	3.05115
3sgb	I	K	13	13	A	E	I	-2.53479
3sgb	I	K	13	13	C	E	I	-0.57636
3sgb	I	K	13	13	D	E	I	-0.61434
3sgb	I	K	13	13	E	E	I	0.03174
3sgb	I	K	13	13	F	E	I	-0.71502
3sgb	I	K	13	13	G	E	I	-0.71502
3sgb	I	K	13	13	H	E	I	-0.39563
3sgb	I	K	13	13	I	E	I	-1.32511
3sgb	I	K	13	13	L	E	I	-1.79097
3sgb	I	K	13	13	M	E	I	-1.14931
3sgb	I	K	13	13	N	E	I	-0.64997
3sgb	I	K	13	13	P	E	I	0
3sgb	I	K	13	13	Q	E	I	-0.61434
3sgb	I	K	13	13	R	E	I	-0.68264
3sgb	I	K	13	13	S	E	I	-2.55002
3sgb	I	K	13	13	T	E	I	-1.92072
3sgb	I	K	13	13	V	E	I	-0.9413
3sgb	I	K	13	13	W	E	I	-0.01319
3sgb	I	K	13	13	Y	E	I	-0.57636
3sgb	I	L	18	18	A	E	I	2.92956
3sgb	I	L	18	18	C	E	I	-0.01319
3sgb	I	L	18	18	D	E	I	5.58633
3sgb	I	L	18	18	E	E	I	6.08553
3sgb	I	L	18	18	F	E	I	1.35406
3sgb	I	L	18	18	G	E	I	4.93083
3sgb	I	L	18	18	H	E	I	1.68899
3sgb	I	L	18	18	I	E	I	4.41618
3sgb	I	L	18	18	K	E	I	3.13586
3sgb	I	L	18	18	M	E	I	0.4467
3sgb	I	L	18	18	N	E	I	3.35044
3sgb	I	L	18	18	P	E	I	8.32319
3sgb	I	L	18	18	Q	E	I	2.50805
3sgb	I	L	18	18	R	E	I	3.31806
3sgb	I	L	18	18	S	E	I	4.09785
3sgb	I	L	18	18	T	E	I	3.15818
3sgb	I	L	18	18	V	E	I	2.99603
3sgb	I	L	18	18	W	E	I	1.83812
3sgb	I	L	18	18	Y	E	I	1.65167
3sgb	I	N	28	28	S	E	I	0.0097
3sgb	I	N	36	36	A	E	I	0.32626
3sgb	I	N	36	36	C	E	I	0.34463
3sgb	I	N	36	36	D	E	I	0.89775
3sgb	I	N	36	36	E	E	I	0.94873
3sgb	I	N	36	36	F	E	I	-0.13932
3sgb	I	N	36	36	G	E	I	0.30731
3sgb	I	N	36	36	H	E	I	-0.12299
3sgb	I	N	36	36	I	E	I	0.19505
3sgb	I	N	36	36	K	E	I	0.57102
3sgb	I	N	36	36	L	E	I	0.73002
3sgb	I	N	36	36	M	E	I	0.1387
3sgb	I	N	36	36	P	E	I	0.57102
3sgb	I	N	36	36	Q	E	I	0.23998
3sgb	I	N	36	36	R	E	I	0.57102
3sgb	I	N	36	36	S	E	I	0.40306
3sgb	I	N	36	36	T	E	I	0.0097
3sgb	I	N	36	36	V	E	I	-0.23836
3sgb	I	N	36	36	W	E	I	0.51843
3sgb	I	N	36	36	Y	E	I	-0.1071
3sgb	I	P	14	14	A	E	I	-0.18674
3sgb	I	P	14	14	C	E	I	-0.32267
3sgb	I	P	14	14	D	E	I	-1.0181
3sgb	I	P	14	14	E	E	I	-0.61434
3sgb	I	P	14	14	F	E	I	-0.33993
3sgb	I	P	14	14	G	E	I	0.05297
3sgb	I	P	14	14	H	E	I	0.27359
3sgb	I	P	14	14	I	E	I	-0.02329
3sgb	I	P	14	14	K	E	I	0.1124
3sgb	I	P	14	14	L	E	I	-0.13932
3sgb	I	P	14	14	M	E	I	-0.49328
3sgb	I	P	14	14	N	E	I	-0.12299
3sgb	I	P	14	14	Q	E	I	-0.31144
3sgb	I	P	14	14	R	E	I	0.30731
3sgb	I	P	14	14	S	E	I	0.06477
3sgb	I	P	14	14	T	E	I	-0.1071
3sgb	I	P	14	14	V	E	I	-0.30591
3sgb	I	P	14	14	W	E	I	-0.49328
3sgb	I	P	14	14	Y	E	I	-0.39563
3sgb	I	R	21	21	A	E	I	0.05297
3sgb	I	R	21	21	C	E	I	0.54468
3sgb	I	R	21	21	D	E	I	0.62934
3sgb	I	R	21	21	E	E	I	0.66172
3sgb	I	R	21	21	F	E	I	0.22465
3sgb	I	R	21	21	G	E	I	1.09109
3sgb	I	R	21	21	H	E	I	0.44714
3sgb	I	R	21	21	I	E	I	0.23998
3sgb	I	R	21	21	K	E	I	-0.27376
3sgb	I	R	21	21	L	E	I	0.22465
3sgb	I	R	21	21	M	E	I	0.1257
3sgb	I	R	21	21	N	E	I	0.32626
3sgb	I	R	21	21	P	E	I	7.57288
3sgb	I	R	21	21	Q	E	I	0.04093
3sgb	I	R	21	21	S	E	I	0.27359
3sgb	I	R	21	21	T	E	I	0.44714
3sgb	I	R	21	21	V	E	I	-0.02329
3sgb	I	R	21	21	W	E	I	0.30731
3sgb	I	R	21	21	Y	E	I	0.2897
3sgb	I	T	17	17	A	E	I	3.36114
3sgb	I	T	17	17	C	E	I	2.88377
3sgb	I	T	17	17	D	E	I	4.88416
3sgb	I	T	17	17	E	E	I	4.56149
3sgb	I	T	17	17	F	E	I	3.58647
3sgb	I	T	17	17	G	E	I	5.50314
3sgb	I	T	17	17	H	E	I	3.45672
3sgb	I	T	17	17	I	E	I	1.72746
3sgb	I	T	17	17	K	E	I	2.00608
3sgb	I	T	17	17	L	E	I	2.43545
3sgb	I	T	17	17	M	E	I	2.00608
3sgb	I	T	17	17	N	E	I	3.20715
3sgb	I	T	17	17	P	E	I	3.13586
3sgb	I	T	17	17	Q	E	I	2.89762
3sgb	I	T	17	17	R	E	I	1.9441
3sgb	I	T	17	17	S	E	I	2.46618
3sgb	I	T	17	17	V	E	I	2.22749
3sgb	I	T	17	17	W	E	I	2.99603
3sgb	I	T	17	17	Y	E	I	3.31806
3sgb	I	Y	20	20	A	E	I	1.91538
3sgb	I	Y	20	20	C	E	I	1.67062
3sgb	I	Y	20	20	D	E	I	2.82299
3sgb	I	Y	20	20	E	E	I	2.00608
3sgb	I	Y	20	20	F	E	I	0.16633
3sgb	I	Y	20	20	G	E	I	2.80112
3sgb	I	Y	20	20	H	E	I	1.53714
3sgb	I	Y	20	20	I	E	I	3.5398
3sgb	I	Y	20	20	K	E	I	3.38311
3sgb	I	Y	20	20	L	E	I	1.55326
3sgb	I	Y	20	20	M	E	I	1.9737
3sgb	I	Y	20	20	N	E	I	3.11266
3sgb	I	Y	20	20	P	E	I	6.18519
3sgb	I	Y	20	20	Q	E	I	3.2334
3sgb	I	Y	20	20	R	E	I	2.72046
3sgb	I	Y	20	20	S	E	I	2.00608
3sgb	I	Y	20	20	T	E	I	4.80108
3sgb	I	Y	20	20	V	E	I	4.35748
3sgb	I	Y	20	20	W	E	I	0.3831
4cpa	I	P	36	34	G	A	I	2.59325
4cpa	I	V	38	36	A	A	I	2.32294
4cpa	I	V	38	36	F	A	I	0
4cpa	I	V	38	36	G	A	I	3.73056
4cpa	I	V	38	36	I	A	I	0.19912
4cpa	I	V	38	36	L	A	I	1.27796
4cpa	I	Y	37	35	F	A	I	0
4cpa	I	Y	37	35	G	A	I	0.50142
